# Supplementary material for: Genetic Analysis of the Early Natural History of Epithelial Ovarian Carcinoma
Source: PLoS One. 2010 Apr 26;5(4):e10358. doi: 10.1371/journal.pone.0010358 (PMC2859950; doi:10.1371/journal.pone.0010358)
Supplement: Table S5 — Genes differentially expressed in ovarian cystic epithelium and ovarian cancer compared to ovarian surface epithelium. “FC(C)” refers to the fold-change in ovarian cyst compared to ovarian surface epithelium, followed by the corresponding P-value; “FC(T)” refers to the fold-change in ovarian cancer compared to ovarian surface epithelium, followed by the corresponding P-value. (0.17 MB XLS) [file pone.0010358.s005.xls]

## Sheet: Imported up-ct-s.txt
Supplemental Table S5. Genes differentially expressed in ovarian cystic epithelium and ovarian cancer compared to ovarian surface epithelium. "FC(C)" refers to the fold-change in ovarian cyst compared to ovarian surface epithelium,
followed by the corresponding P-value; "FC(T)" refers to the fold-change in ovarian cancer compared to ovarian surface epithelium, followed by the corresponding P-value.
________________________________________________________________________________________________________________________										__________________________________________________________________________
List No.	Probe Set	FC(C)	P(C)	FC(T)	P(T)	Gene Symbol	Gene ID	Unigene	Chromosome	Description
1	203701_s_at	9	1e-05	10	0.003	FLJ20244	55621	Hs.515169	19p13.13	hypothetical protein FLJ20244
2	212996_s_at	35	7e-05	29	2e-05	C21orf108	9875	Hs.443257	21q22.11	chromosome 21 open reading frame 108
3	202890_at	223	9e-05	113	0.0002	MAP7	9053	Hs.486548	6q23.2	microtubule-associated protein 7
4	201563_at	4	9e-05	2	0.008	SORD	6652	Hs.878	15q15.3	sorbitol dehydrogenase
5	202935_s_at	263	0.0001	172	7e-05	SOX9	6662	Hs.2316	17q24.3-q25.1	SRY (sex determining region Y)-box 9
6	207540_s_at	51	0.0001	49	0.0001	SYK	6850	Hs.371720	9q22	spleen tyrosine kinase
7	203358_s_at	23	0.0001	57	4e-06	EZH2	2146	Hs.444082	7q35-q36	enhancer of zeste homolog 2 (Drosophila)
8	212312_at	6	0.0001	5	0.004	BCL2L1	598	Hs.516966	20q11.21	cytochrome c oxidase subunit IV isoform 2
9	204542_at	3	0.0001	3	0.003	SIAT7B	10610	Hs.288215	17q25.3	sialyltransferase 7
10	221884_at	126	0.0002	289	0.0001	EVI1	2122	Hs.165830	3q24-q28	ecotropic viral integration site 1 (oncogene Evi-1)
11	201839_s_at	84	0.0002	298	8e-05	TACSTD1	4072	Hs.692	2p21	tumor-associated calcium signal transducer 1
12	209739_s_at	15	0.0002	3	0.04	PNPLA4	8228	Hs.264	Xp22.3	patatin-like phospholipase domain-containing protein 4
13	209705_at	13	0.0002	5	0.002	M96	22823	Hs.31016	1p22.1	likely ortholog of mouse metal response element binding transcription factor 2
14	205928_at	40	0.0003	87	8e-05	ZNF443	10224	Hs.142150	19p13.2	zinc finger protein 443
15	204798_at	22	0.0003	8	0.002	MYB	4602	Hs.531941	6q22-q23	v-myb myeloblastosis viral oncogene homolog (avian)
16	214053_at	17	0.0003	10	0.006	ERBB4	2066	Hs.390729	2q33.3-q34	v-erb-a erythroblastic leukemia viral oncogene homolog 4
17	202043_s_at	4	0.0003	2	0.01	SMS	6611	Hs.529887	Xp22.1	spermine synthase
18	201036_s_at	16	0.0004	9	0.004	HADHSC	3033	Hs.438289	4q22-q26	L-3-hydroxyacyl-Coenzyme A dehydrogenase, short chain
19	201291_s_at	16	0.0004	60	0.0001	TOP2A	7153	Hs.156346	17q21-q22	topoisomerase (DNA) II alpha 170kDa
20	219031_s_at	11	0.0004	16	0.001	CGI-37	51388	Hs.501513	16q22.1	comparative gene identification transcript 37
21	205642_at	10	0.0004	4	0.01	CEP1	11064	Hs.246344	9q33-q34	centrosomal protein 1
22	204401_at	5	0.0004	4	0.005	KCNN4	3783	Hs.10082	19q13.2	potassium intermediate/small conductance calcium-activated channel, subfamily N, member 4
23	218645_at	20	0.0005	4	0.04	ZNF277	11179	Hs.489722	7q31.1	zinc finger protein (C2H2 type) 277
24	203374_s_at	9	0.0008	5	0.0008	TPP2	7174	Hs.432424	13q32-q33	tripeptidyl peptidase II
25	219281_at	5	0.0008	4	0.0003	MSRA	4482	Hs.490981	8p23.1	methionine sulfoxide reductase A
26	201555_at	2	0.0008	2	0.02	MCM3	4172	Hs.179565	6p12	MCM3 minichromosome maintenance deficient 3
27	211297_s_at	59	0.001	111	9e-05	CDK7	1022	Hs.184298	5q12.1	cyclin-dependent kinase 7
28	206799_at	50	0.001	82	0.02	SCGB1D2	10647	Hs.204096	11q13	secretoglobin, family 1D, member 2
29	219880_at	32	0.001	29	0.007	FLJ23053	64942	Hs.458412	5q35.3	hypothetical protein FLJ23053
30	37577_at	22	0.001	10	0.01	ARHGAP19	84986	Hs.80305	10q24.2	Rho GTPase activating protein 19
31	201582_at	17	0.001	7	0.009	SEC23B	10483	Hs.369373	20p11.23	Sec23 homolog B (S. cerevisiae)
32	206526_at	16	0.001	9	0.002	RIBC2	26150	Hs.475110	22q13.31	chromosome 22 open reading frame 11
33	212560_at	13	0.001	11	0.002	SORL1	6653	Hs.368592	11q23.2-q24.2	sortilin-related receptor, L(DLR class) A repeats-containing
34	218966_at	10	0.001	9	5e-05	MYO5C	55930	Hs.487036	15q21	myosin VC
35	204720_s_at	6	0.001	2	0.02	DNAJC6	9829	Hs.536063	1pTER-q31.3	DnaJ (Hsp40) homolog, subfamily C, member 6
36	205427_at	6	0.001	5	0.006	ZNF354A	6940	Hs.484324	5q35.3	zinc finger protein 354A
37	203775_at	4	0.001	9	0.001	SLC25A13	10165	Hs.489190	7q21.3	solute carrier family 25, member 13 (citrin)
38	218769_s_at	3	0.001	1	0.04	ANKRA2	57763	Hs.239154	5q12-q13	ankyrin repeat, family A (RFXANK-like), 2
39	200709_at	2	0.001	2	0.003	FKBP1A	2280	Hs.471933	20p13	FK506 binding protein 1A, 12kDa
40	218885_s_at	59	0.002	77	0.0003	GALNT12	79695	Hs.47099	9q31.1	UDP-N-acetyl-alpha-D-galactosamine:polypeptide N-acetylgalactosaminyltransferase 12
41	203218_at	28	0.002	13	0.003	MAPK9	5601	Hs.484371	5q35	mitogen-activated protein kinase 9
42	204493_at	26	0.002	12	0.009	BID	637	Hs.474150	22q11.1	BH3 interacting domain death agonist
43	204079_at	23	0.002	10	0.0009	TPST2	8459	Hs.474441	22q12.1	tyrosylprotein sulfotransferase 2
44	219918_s_at	23	0.002	58	9e-05	ASPM	259266	Hs.121028	1q31	asp (abnormal spindle)-like, microcephaly associated (Drosophila)
45	221584_s_at	22	0.002	21	0.002	KCNMA1	3778	Hs.144795	10q22-q23	potassium large conductance calcium-activated channel, subfamily M, alpha member 1
46	205980_s_at	16	0.002	15	0.006	ARHGAP8	23779	Hs.102336	22q13.31	Rho GTPase activating protein 8
47	203659_s_at	14	0.002	3	0.004	RFP2	10206	Hs.436922	13q14	ret finger protein 2
48	214844_s_at	12	0.002	11	0.003	DOK5	55816	Hs.473133	20q13.2	docking protein 5
49	218009_s_at	11	0.002	74	5e-05	PRC1	9055	Hs.459362	15q26.1	protein regulator of cytokinesis 1
50	217196_s_at	10	0.002	7	0.0008	KIAA1078	23271	Hs.23585	1q32.1	KIAA1078 protein
51	203508_at	9	0.002	9	0.0005	TNFRSF1B	7133	Hs.256278	1p36.3-p36.2	tumor necrosis factor receptor superfamily, member 1B
52	201353_s_at	7	0.002	7	0.003	BAZ2A	11176	Hs.314263	12q24.3-qTER	bromodomain adjacent to zinc finger domain, 2A
53	213058_at	7	0.002	3	0.05	KIAA1043	23331	Hs.387856	22q12.1	KIAA1043 protein
54	211033_s_at	6	0.002	3	0.02	PEX7	5191	Hs.280932	6q21-q22.2	peroxisomal biogenesis factor 7
55	218857_s_at	6	0.002	4	0.0005	ASRGL1	80150	Hs.535326	11q12.3	asparaginase like 1
56	209972_s_at	4	0.002	8	0.0006	HRI	27102	Hs.520205	7p22	JTV1 gene
57	214438_at	4	0.002	5	0.04	HLX1	3142	Hs.74870	1q41-q42.1	H2.0-like homeo box 1 (Drosophila)
58	203932_at	3	0.002	3	0.04	HLA-DMB	3109	Hs.1162	6p21.3	major histocompatibility complex, class II, DM beta
59	218097_s_at	1	0.002	2	0.01	CUEDC2	79004	Hs.500874	10q24.32	CUE domain containing 2
60	219667_s_at	36	0.003	6	0.02	BANK1	55024	Hs.480400	4q24	B-cell scaffold protein with ankyrin repeats 1
61	202495_at	19	0.003	24	0.003	TBCC	6903	Hs.75064	6pTER-p12.1	tubulin-specific chaperone c
62	216237_s_at	19	0.003	15	0.0009	MCM5	4174	Hs.517582	22q13.1	MCM5 minichromosome maintenance deficient 5, cell division cycle 46
63	212306_at	17	0.003	7	0.01	CLASP2	23122	Hs.108614	3p22.3	cytoplasmic linker associated protein 2
64	219767_s_at	11	0.003	6	0.007	CRYZL1	9946	Hs.352671	21q21.3	crystallin, zeta (quinone reductase)-like 1
65	209533_s_at	7	0.003	10	0.002	PLAA	9373	Hs.27182	9p21	phospholipase A2-activating protein
66	210653_s_at	7	0.003	5	0.02	BCKDHB	594	Hs.436387	6q13-q15	branched chain keto acid dehydrogenase E1
67	222361_at	7	0.003	4	0.02	LOC286222	286222		9q34.3	similar to beta-tubulin 4Q
68	217955_at	6	0.003	3	0.0001	BCL2L13	23786	Hs.546359	22q11	BCL2-like 13 (apoptosis facilitator)
69	218462_at	6	0.003	6	0.003	RPF1	80135	Hs.481202	1p22.3	RNA processing factor 1
70	202439_s_at	5	0.003	5	0.01	IDS	3423	Hs.303154	Xq28	iduronate 2-sulfatase (Hunter syndrome)
71	212532_s_at	5	0.003	3	0.006	FLJ30656	124801	Hs.355570	17q21.31	hypothetical protein FLJ30656
72	205225_at	4	0.003	5	0.0008	ESR1	2099	Hs.208124	6q25.1	estrogen receptor 1
73	205406_s_at	4	0.003	5	0.02	SPA17	53340	Hs.286233	11q24.2	sperm autoantigenic protein 17
74	206566_at	3	0.003	2	0.04	SLC7A1	6541	Hs.14846	13q12-q14	solute carrier family 7, member 1
75	212641_at	3	0.003	2	0.02	HIVEP2	3097	Hs.510172	6q23-q24	human immunodeficiency virus type I enhancer binding protein 2
76	203892_at	2	0.003	23	0.0001	WFDC2	10406	Hs.2719	20q12-q13.2	WAP four-disulfide core domain 2
77	222139_at	83	0.004	57	0.01	KIAA1466	57612	Hs.147710	7q33	KIAA1466 protein
78	219132_at	55	0.004	21	0.005	PELI2	57161	Hs.105103	14q21	pellino homolog 2 (Drosophila)
79	39248_at	23	0.004	65	0.001	AQP3	360	Hs.234642	9p13	aquaporin 3
80	220302_at	19	0.004	4	0.01	MAK	4117	Hs.446125	6q22	male germ cell-associated kinase
81	209934_s_at	15	0.004	10	0.007	ATP2C1	27032	Hs.546361	3q22.1	ATPase, Ca++ transporting, type 2C, member 1
82	215102_at	14	0.004	5	0.05	LOC89231	89231	Hs.331147	7p14.3	LOC89231
83	204489_s_at	13	0.004	27	0.0003	CD44	960	Hs.502328	11p13	CD44 antigen (homing function and Indian blood group system)
84	213161_at	13	0.004	6	0.005	C9orf97	158427	Hs.494595	9q22.33	chromosome 9 open reading frame 97
85	221096_s_at	9	0.004	4	0.02	PRO1580	55374	Hs.546401	5q31.3	hypothetical protein PRO1580
86	212599_at	7	0.004	3	0.04	AUTS2	26053	Hs.21631	7q11.22-q11.23	autism susceptibility candidate 2
87	219277_s_at	7	0.004	29	0.001	OGDHL	55753	Hs.17860	10q11.23	oxoglutarate dehydrogenase-like
88	202860_at	6	0.004	9	0.005	KIAA0476	9909	Hs.6684	1p36.13-q31.3	KIAA0476
89	204113_at	6	0.004	22	0.003	CUGBP1	10658	Hs.530727	11p11	CUG triplet repeat, RNA binding protein 1
90	208979_at	5	0.004	5	0.004	NCOA6	23054	Hs.368971	20q11	nuclear receptor coactivator 6
91	201911_s_at	4	0.004	3	0.02	FARP1	10160	Hs.403917	13q32.2-q32.3	FERM, RhoGEF (ARHGEF) and pleckstrin domain protein 1
92	204308_s_at	2	0.004	3	0.0006	KIAA0329	9895	Hs.195667	14q32.33	KIAA0329
93	266_s_at	26	0.005	92	0.001	CD24	934	Hs.375108	6q21	CD24 antigen
94	219850_s_at	25	0.005	18	0.004	EHF	26298	Hs.502306	11p12	ets homologous factor
95	41660_at	24	0.005	18	0.007	CELSR1	9620	Hs.252387	22q13.3	cadherin, EGF LAG seven-pass G-type receptor 1
96	213839_at	15	0.005	29	0.0001	KIAA0500	57237	Hs.525566	14q32.2	KIAA0500 protein
97	201940_at	11	0.005	6	0.01	CPD	1362	Hs.446079	17p11.1-q11.2	carboxypeptidase D
98	221190_s_at	9	0.005	13	0.006	C18orf8	29919	Hs.529006	18q11.2	chromosome 18 open reading frame 8
99	202659_at	8	0.005	17	0.001	PSMB10	5699	Hs.9661	16q22.1	proteasome subunit, beta type, 10
100	205548_s_at	8	0.005	7	0.01	BTG3	10950	Hs.473420	21q21.1-q21.2	BTG family, member 3
101	209064_x_at	5	0.005	7	0.002	PAIP1	10605	Hs.482038	5p12	poly(A) binding protein interacting protein 1
102	220771_at	5	0.005	3	0.05	LOC51152	51152	Hs.132526	1q21.1	melanoma antigen
103	203848_at	4	0.005	3	0.004	AKAP8	10270	Hs.199029	19p13.1-q12	A kinase (PRKA) anchor protein 8
104	213925_at	3	0.005	4	0.003	DKFZp761P211	375057	Hs.116827	1q42.13	similar to hypothetical protein Y97E10AL.1
105	36499_at	2	0.005	2	0.009	CELSR2	1952	Hs.57652	1p21	cadherin, EGF LAG seven-pass G-type receptor 2
106	218305_at	2	0.005	4	0.008	IPO4	79711	Hs.411865	14q11.2	importin 4
107	221490_at	2	0.005	2	0.03	UBAP1	51271	Hs.268963	9p22-p21	ubiquitin associated protein 1
108	205584_at	38	0.006	27	0.0006	FLJ23018	79868	Hs.443061	Xq23	hypothetical protein FLJ23018
109	211596_s_at	31	0.006	48	0.003	LRIG1	26018	Hs.518055		leucine-rich repeats and immunoglobulin-like domains 1
110	213993_at	19	0.006	12	0.02	SPON1	10418	Hs.445818	11p15.2	spondin 1, extracellular matrix protein
111	204846_at	11	0.006	26	0.0004	CP	1356	Hs.282557	3q23-q25	ceruloplasmin (ferroxidase)
112	212692_s_at	9	0.006	9	0.008	LRBA	987	Hs.480938	4q31.23	LPS-responsive vesicle trafficking, beach and anchor containing
113	204373_s_at	8	0.006	5	0.01	CAP350	9857	Hs.413045	1p36.13-q41	centrosome-associated protein 350
114	220018_at	7	0.006	4	0.02	CBLL1	79872	Hs.546435	7q22.3	Cas-Br-M ecotropic retroviral transforming sequence-like 1
115	200771_at	6	0.006	5	0.01	LAMC1	3915	Hs.497039	1q31	laminin, gamma 1 (formerly LAMB2)
116	202078_at	5	0.006	5	0.007	COPS3	8533	Hs.6076	17p11.2	COP9 constitutive photomorphogenic homolog subunit 3
117	212543_at	4	0.006	3	0.005	AIM1	202	Hs.486074	6q21	absent in melanoma 1
118	214795_at	2	0.006	2	0.02	PRKCBP1	23613	Hs.446240	20q13.13	protein kinase C binding protein 1
119	201458_s_at	15	0.007	8	0.05	BUB3	9184	Hs.418533	10q26	BUB3 budding uninhibited by benzimidazoles 3 homolog
120	213355_at	15	0.007	50	6e-05	SIAT10	10402	Hs.148716	3q12.2	sialyltransferase 10 (alpha-2,3-sialyltransferase VI)
121	209028_s_at	9	0.007	11	0.003	SSH3BP1	10006	Hs.508148	10p11.2	abl-interactor 1
122	211763_s_at	8	0.007	3	0.04	UBE2B	7320	Hs.385986	5q23-q31	ubiquitin-conjugating enzyme E2B (RAD6 homolog)
123	219041_s_at	7	0.007	9	0.005	REPIN1	29803	Hs.521289	7q36.1	replication initiator 1
124	201724_s_at	6	0.007	5	0.02	GALNT1	2589	Hs.514806	18q12.1	UDP-N-acetyl-alpha-D-galactosamine:polypeptide N-acetylgalactosaminyltransferase 1
125	201454_s_at	5	0.007	6	0.003	NPEPPS	9520	Hs.443837	17q21	aminopeptidase puromycin sensitive
126	213700_s_at	3	0.007	3	0.01	FLJ10803	55744	Hs.289007	15q22	pyruvate kinase, muscle
127	208649_s_at	2	0.007	3	0.02	VCP	7415	Hs.529782	9p13-p12	valosin-containing protein
128	205761_s_at	22	0.008	4	0.03	PP35	11062	Hs.97627	7q22-q31	protein similar to E.coli yhdg and R. capsulatus nifR3
129	215117_at	7	0.008	4	0.005	RAG2	5897	Hs.159376	11p13	recombination activating gene 2
130	218932_at	7	0.008	5	0.02	FLJ20729	54680	Hs.5111	1p22.3	hypothetical protein FLJ20729
131	220212_s_at	6	0.008	9	0.005	THADA	63892	Hs.369592	2p22.1	thyroid adenoma associated
132	221257_x_at	5	0.008	3	0.003	FBXO38	81545	Hs.483772	5q33.1	likely ortholog of mouse modulator of KLF7 activity
133	220177_s_at	2	0.008	6	0.0008	TMPRSS3	64699	Hs.208600	21q22.3	transmembrane protease, serine 3
134	216379_x_at	87	0.009	278	0.004	KIAA1919	91749	Hs.400572	6q22	KIAA1919
135	219703_at	23	0.009	11	0.01	MNS1	55329	Hs.444483	15q21.2	meiosis-specific nuclear structural protein 1
136	220770_s_at	16	0.009	19	0.0007	LOC63920	63920		5q34	transposon-derived Buster3 transposase-like
137	213923_at	12	0.009	10	0.008	RAP2B	5912	Hs.98643	3q25.2	RAP2B, member of RAS oncogene family
138	211682_x_at	10	0.009	7	0.02	UGT2B28	54490	Hs.137585	4q13.3	UDP glycosyltransferase 2 family, polypeptide B28
139	218568_at	10	0.009	15	0.004	FLJ10842	55750	Hs.260238	7q34	hypothetical protein FLJ10842
140	201489_at	9	0.009	12	0.005	PPIF	10105	Hs.381072	10q22-q23	peptidylprolyl isomerase F (cyclophilin F)
141	207547_s_at	6	0.009	16	0.02	TU3A	11170	Hs.8022	3p21.1	TU3A protein
142	209567_at	5	0.009	4	0.003	RRS1	23212	Hs.71827	8q12.3	RRS1 ribosome biogenesis regulator homolog
143	217161_x_at	4	0.009	8	0.0003	AGC1	176	Hs.2159	15q26.1	aggrecan 1
144	203971_at	3	0.009	7	0.0004	SLC31A1	1317	Hs.532315	9q31-q32	solute carrier family 31 (copper transporters), member 1
145	219174_at	99	0.01	70	0.01	CCDC2	80173	Hs.145402	9p21.1	coiled-coil domain containing 2
146	218819_at	64	0.01	27	0.02	DDX26	26512	Hs.439440	13q14.12-q14.2	DEAD/H (Asp-Glu-Ala-Asp/His) box polypeptide 26
147	205415_s_at	27	0.01	18	0.01	MJD	4287	Hs.532632	14q24.3-q32.2	Machado-Joseph disease
148	218858_at	19	0.01	10	0.03	DEPDC6	64798	Hs.303788	8q24.12	DEP domain containing 6
149	204871_at	13	0.01	11	0.01	MTERF	7978	Hs.532216	7q21-q22	transcription termination factor, mitochondrial
150	203122_at	12	0.01	9	0.02	TTC15	51112	Hs.252713	2p25.3	tetratricopeptide repeat domain 15
151	207571_x_at	12	0.01	5	0.05	C1orf38	9473	Hs.10649	1p35.3	chromosome 1 open reading frame 38
152	208879_x_at	12	0.01	17	0.0003	C20orf14	24148	Hs.31334	20q13.33	chromosome 20 open reading frame 14
153	205443_at	11	0.01	7	0.008	SNAPC1	6617	Hs.179312	14q22	small nuclear RNA activating complex, polypeptide 1, 43kDa
154	207564_x_at	11	0.01	7	0.03	OGT	8473	Hs.405410	Xq13	O-linked N-acetylglucosamine (GlcNAc) transferase
155	218879_s_at	11	0.01	6	0.02	FLJ12998	64779	Hs.343627	16q24.1	hypothetical protein FLJ12998
156	219498_s_at	11	0.01	6	0.03	BCL11A	53335	Hs.370549	2p16.1	B-cell CLL/lymphoma 11A (zinc finger protein)
157	212070_at	10	0.01	29	0.004	GPR56	9289	Hs.513633	16q13	G protein-coupled receptor 56
158	214783_s_at	10	0.01	17	0.006	ANXA11	311	Hs.530291	10q23	annexin A11
159	212841_s_at	9	0.01	9	0.01	PPFIBP2	8495	Hs.16019	11p15.4	PTPRF interacting protein, binding protein 2
160	214268_s_at	9	0.01	12	0.004	MTMR4	9110	Hs.514373	17q22-q23	myotubularin related protein 4
161	218442_at	8	0.01	6	0.01	TTC4	7268	Hs.412482	1p31.3	tetratricopeptide repeat domain 4
162	219289_at	8	0.01	6	0.01	FLJ20718	55027	Hs.313917	16q12.1	hypothetical protein FLJ20718
163	212247_at	6	0.01	8	0.007	NUP205	23165	Hs.490238	7q33	nucleoporin 205kDa
164	218622_at	6	0.01	11	0.001	NUP37	79023	Hs.444276	12q23.3	nucleoporin 37kDa
165	203164_at	5	0.01	7	0.007	SLC33A1	9197	Hs.478031	3q25.31	solute carrier family 33 (acetyl-CoA transporter), member 1
166	204294_at	5	0.01	3	0.05	AMT	275	Hs.102	3p21.2-p21.1	aminomethyltransferase
167	208025_s_at	5	0.01	15	0.009	HMGA2	8091	Hs.505924	12q15	high mobility group AT-hook 2
168	209794_at	5	0.01	14	0.006	SRGAP2	9901	Hs.475364	3p25.3	SLIT-ROBO Rho GTPase activating protein 2
169	215338_s_at	5	0.01	8	0.0008	NKTR	4820	Hs.529509	3p23-p21	natural killer-tumor recognition sequence
170	219649_at	5	0.01	5	0.02	ALG6	29929	Hs.80042	1p31.3	asparagine-linked glycosylation 6 homolog
171	202160_at	4	0.01	3	0.02	CREBBP	1387	Hs.459759	16p13.3	CREB binding protein (Rubinstein-Taybi syndrome)
172	202348_s_at	4	0.01	4	0.01	DYT1	1861	Hs.534312	9q34	dystonia 1, torsion (autosomal dominant; torsin A)
173	205474_at	4	0.01	2	0.03	CRLF3	51379	Hs.370168	17q11.2	cytokine receptor-like factor 3
174	206015_s_at	4	0.01	3	0.01	FOXJ3	22887	Hs.26023	1pTER-q31.3	forkhead box J3
175	212591_at	4	0.01	8	0.006	KIAA0117	23029	Hs.535224	1q42.3	KIAA0117 protein
176	221864_at	4	0.01	3	0.04	MGC13024	93129	Hs.460617	16p11.2	hypothetical protein MGC13024
177	35436_at	3	0.01	8	0.0004	GOLGA2	2801	Hs.155827	9q34.13	golgi autoantigen, golgin subfamily a, 2
178	212114_at	3	0.01	3	0.02	LOC387869	387869	Hs.213541	12q15	LOC387869
179	218180_s_at	3	0.01	8	0.002	EPS8L2	64787	Hs.55016	11p15.5	EPS8-like 2
180	220078_at	3	0.01	3	0.03	USP31	84196	Hs.467524	1p36.12	ubiquitin specific protease 48
181	208270_s_at	2	0.01	2	0.04	RNPEP	6051	Hs.497391	1q32	arginyl aminopeptidase (aminopeptidase B)
182	212175_s_at	2	0.01	3	0.001	AK2	204	Hs.470907	1p34	adenylate kinase 2
183	213811_x_at	2	0.01	2	0.05	TCF3	6929	Hs.371282	1q23	pre-B-cell leukemia transcription factor 1
184	214501_s_at	2	0.01	3	0.004	H2AFY	9555	Hs.420272	5q31.3-q32	H2A histone family, member Y
185	216835_s_at	2	0.01	2	0.003	DOK1	1796	Hs.103854	2p13	docking protein 1, 62kDa
186	218826_at	2	0.01	2	0.03	SLC35F2	54733	Hs.524014	11q23.1	solute carrier family 35, member F2
187	219148_at	2	0.01	8	0.0006	TOPK	55872	Hs.104741	8p21.2	T-LAK cell-originated protein kinase
188	219359_at	2	0.01	6	0.0003	FLJ22635	80162	Hs.353181	11p15.5	hypothetical protein FLJ22635
189	213310_at	27	0.02	38	0.007	EIF2C2	27161	Hs.449415	8q24	eukaryotic translation initiation factor 2C, 2
190	206752_s_at	24	0.02	12	0.05	DFFB	1677	Hs.133089	1p36.3	DNA fragmentation factor, 40kDa, beta polypeptide
191	221883_at	24	0.02	9	0.02	PKNOX1	5316	Hs.431043	21q22.3	PBX/knotted 1 homeobox 1
192	201927_s_at	23	0.02	25	0.01	PKP4	8502	Hs.407580	2q23-q31	plakophilin 4
193	205997_at	20	0.02	37	6e-06	ADAM28	10863	Hs.528304	8p21.2	a disintegrin and metalloproteinase domain 28
194	208875_s_at	20	0.02	45	0.001	PAK2	5062	Hs.518530	3q29	p21 (CDKN1A)-activated kinase 2
195	218911_at	20	0.02	21	0.02	YEATS4	8089	Hs.4029	12q13-q15	glioma-amplified sequence-41
196	205120_s_at	18	0.02	37	0.003	SGCB	6443	Hs.438953	4q12	sarcoglycan, beta
197	213523_at	16	0.02	28	0.01	CCNE1	898	Hs.244723	19q12	cyclin E1
198	219251_s_at	14	0.02	10	0.04	FLJ10300	55112	Hs.389945	7q36.3	hypothetical protein FLJ10300
199	201330_at	11	0.02	7	0.02	RARS	5917	Hs.506215	5q35.1	arginyl-tRNA synthetase
200	203988_s_at	11	0.02	12	0.002	FUT8	2530	Hs.118722	14q24.3	fucosyltransferase 8 (alpha (1,6) fucosyltransferase)
201	214806_at	11	0.02	7	0.01	BICD1	636	Hs.505202	12p11.2-p11.1	Bicaudal D homolog 1 (Drosophila)
202	219266_at	10	0.02	7	0.02	ZNF350	59348	Hs.407694	19q13.41	zinc finger protein 350
203	219545_at	9	0.02	15	0.002	KCTD14	65987	Hs.17296	11q13.4	potassium channel tetramerisation domain containing 14
204	220206_at	9	0.02	18	0.004	ZMYM1	79830	Hs.471243	1p34.3	zinc finger, MYM domain containing 1
205	64418_at	8	0.02	5	0.01	AP1GBP1	11276	Hs.101480	17q21.1	AP1 gamma subunit binding protein 1
206	202267_at	8	0.02	6	0.01	LAMC2	3918	Hs.530509	1q25-q31	laminin, gamma 2
207	202670_at	8	0.02	5	0.01	MAP2K1	5604	Hs.145442	15q22.1-q22.33	mitogen-activated protein kinase kinase 1
208	203588_s_at	8	0.02	46	1e-05	TFDP2	7029	Hs.379018	3q23	transcription factor Dp-2 (E2F dimerization partner 2)
209	204784_s_at	8	0.02	15	0.006	MLF1	4291	Hs.85195	3q25.1	myeloid leukemia factor 1
210	211052_s_at	8	0.02	28	0.002	TBCD	6904	Hs.464391	17q25.3	tubulin-specific chaperone d
211	40273_at	7	0.02	20	4e-05	SPHK2	56848	Hs.528006	19q13.2	sphingosine kinase 2
212	203493_s_at	7	0.02	6	0.04	KIAA0092	9702	Hs.101014	11q21	translokin
213	205171_at	7	0.02	4	0.04	PTPN4	5775	Hs.469809	2q14.2	protein tyrosine phosphatase, non-receptor type 4
214	209623_at	7	0.02	5	0.007	MCCC2	64087	Hs.167531	5q12-q13	methylcrotonoyl-Coenzyme A carboxylase 2 (beta)
215	212771_at	7	0.02	11	0.01	C10orf38	221061	Hs.66762	10p13	chromosome 10 open reading frame 38
216	217140_s_at	7	0.02	11	0.003	VDAC1	7416	Hs.519320	5q31	voltage-dependent anion channel 1
217	218704_at	7	0.02	10	0.01	FLJ20315	54894	Hs.500398	17q23.2	hypothetical protein FLJ20315
218	219372_at	7	0.02	4	0.03	CDV1	28981	Hs.528382	12q24.13	carnitine deficiency-associated gene expressed in ventricle 1
219	202722_s_at	6	0.02	12	0.005	GFPT1	2673	Hs.468864	2p13	glutamine-fructose-6-phosphate transaminase 1
220	204069_at	6	0.02	9	0.009	MEIS1	4211	Hs.526754	2p14-p13	Meis1, myeloid ecotropic viral integration site 1 homolog
221	212663_at	6	0.02	5	0.004	KIAA0674	23307	Hs.522351	9q33.1	KIAA0674
222	212924_s_at	6	0.02	21	0.0007	LSM4	25804	Hs.515255	19p13.11	LSM4 homolog, U6 small nuclear RNA associated
223	204060_s_at	5	0.02	4	0.04	PRKX	5613	Hs.390788	Xp22.3	protein kinase, X-linked
224	215407_s_at	5	0.02	7	0.004	ASTN2	23245	Hs.546352	9q33.2	astrotactin 2
225	218248_at	5	0.02	4	0.01	FLJ22794	63901	Hs.150651	11q12.2	FLJ22794 protein
226	218263_s_at	5	0.02	3	0.05	LOC58486	58486	Hs.25726	11p15.3	transposon-derived Buster1 transposase-like protein
227	220028_at	5	0.02	5	0.02	ACVR2B	93	Hs.517775	3p22	activin A receptor, type IIB
228	221536_s_at	5	0.02	10	0.002	FLJ11301	55341	Hs.518505	3q29	hypothetical protein FLJ11301
229	200734_s_at	4	0.02	5	0.008	ARF3	377	Hs.119177	12q13	ADP-ribosylation factor 3
230	206240_s_at	4	0.02	5	0.008	ZNF136	7695	Hs.479874	19p13.2-p13.12	zinc finger protein 136 (clone pHZ-20)
231	213681_at	4	0.02	6	0.01	CYHR1	50626	Hs.459379	8q24.3	cysteine and histidine rich 1
232	218330_s_at	4	0.02	4	0.0007	NAV2	89797	Hs.502116	11p15.1	neuron navigator 2
233	221691_x_at	4	0.02	3	0.05	NPM1	4869	Hs.519452	17q21	anaplastic lymphoma kinase (Ki-1)
234	200606_at	3	0.02	3	0.02	DSP	1832	Hs.519873	6p24	desmoplakin
235	202200_s_at	3	0.02	4	0.03	SRPK1	6732	Hs.443861	6p21.3-p21.2	SFRS protein kinase 1
236	202926_at	3	0.02	3	0.005	NAG	51594	Hs.467759	2p24	neuroblastoma-amplified protein
237	207874_s_at	3	0.02	5	0.002	CFHL4	10877	Hs.194776	1q32	complement factor H related 3
238	212057_at	3	0.02	5	0.001	KIAA0182	23199	Hs.461647	16q24.1	KIAA0182 protein
239	212834_at	3	0.02	4	0.005	DDX52	11056	Hs.408452	17q21.1	DEAD (Asp-Glu-Ala-Asp) box polypeptide 52
240	213835_x_at	3	0.02	2	0.05	GTPBP3	84705	Hs.334885	19p13.12	GTP binding protein 3 (mitochondrial)
241	217905_at	3	0.02	4	0.01	C10orf119	79892	Hs.124246	10q26.13	chromosome 10 open reading frame 119
242	218592_s_at	3	0.02	3	0.003	CECR5	27440	Hs.26890		cat eye syndrome chromosome region, candidate 5
243	200788_s_at	2	0.02	4	0.006	PEA15	8682	Hs.517216	1q21.1	phosphoprotein enriched in astrocytes 15
244	200943_at	2	0.02	2	0.04	HMGN1	3150	Hs.356285	21q22.3	high-mobility group nucleosome binding domain 1
245	207180_s_at	2	0.02	5	0.001	HTATIP2	10553	Hs.90753	11p15.1	HIV-1 Tat interactive protein 2, 30kDa
246	208022_s_at	2	0.02	5	0.003	CDC14B	8555	Hs.40582	9q22.33	CDC14 cell division cycle 14 homolog B (S. cerevisiae)
247	208704_x_at	2	0.02	2	0.03	APLP2	334	Hs.370247	11q24	amyloid beta (A4) precursor-like protein 2
248	208769_at	2	0.02	8	0.0001	EIF4EBP2	1979	Hs.522995	10q21-q22	eukaryotic translation initiation factor 4E binding protein 2
249	213587_s_at	2	0.02	3	0.01	C7orf32	155066	Hs.351612	7q36.1	chromosome 7 open reading frame 32
250	218677_at	2	0.02	4	0.002	S100A14	57402	Hs.288998	1q21.1	S100 calcium binding protein A14
251	221637_s_at	2	0.02	5	0.006	MGC2477	79081	Hs.9061	11q12.3	hypothetical protein MGC2477
252	221708_s_at	2	0.02	3	0.0009	SMAP-1	55898	Hs.389461	15q26.1	smooth muscle cell associated protein-1
253	221927_s_at	2	0.02	6	0.0003	WBSCR21	83451	Hs.182476	7q11.23	Williams Beuren syndrome chromosome region 21
254	59999_at	1	0.02	2	0.04	HIF1AN	55662	Hs.500788	10q24	hypoxia-inducible factor 1, alpha subunit inhibitor
255	211969_at	1	0.02	2	0.0001	HSPCA	3320	Hs.523560	14q32.33	heat shock 90kDa protein 1, alpha
256	213453_x_at	1	0.02	3	0.0003	GAPD	2597	Hs.479728	12p13	glyceraldehyde-3-phosphate dehydrogenase
257	206385_s_at	38	0.03	25	0.04	ANK3	288	Hs.499725	10q21	ankyrin 3, node of Ranvier (ankyrin G)
258	212875_s_at	35	0.03	21	0.04	C21orf25	25966	Hs.473894	21q22.3	chromosome 21 open reading frame 25
259	208998_at	20	0.03	193	0.004	UCP2	7351	Hs.80658	11q13	uncoupling protein 2 (mitochondrial, proton carrier)
260	212493_s_at	17	0.03	23	0.02	HYPB	29072	Hs.517941	3p21.31	huntingtin interacting protein B
261	205258_at	14	0.03	24	0.01	INHBB	3625	Hs.1735	2CEN-q13	inhibin, beta B (activin AB beta polypeptide)
262	214464_at	13	0.03	26	0.01	CDC42BPA	8476	Hs.35433	1q42.11	CDC42 binding protein kinase alpha (DMPK-like)
263	207624_s_at	12	0.03	11	0.001	RPGR	6103	Hs.61438	Xp11.4	retinitis pigmentosa GTPase regulator
264	213720_s_at	12	0.03	30	0.003	SMARCA4	6597	Hs.327527	19p13.2	SWI/SNF related, matrix associated, actin dependent regulator of chromatin, subfamily a, member 4
265	221081_s_at	12	0.03	20	0.01	FLJ22457	79961	Hs.154334	1p13.2	hypothetical protein FLJ22457
266	219836_at	11	0.03	12	0.02	ZBED2	79413	Hs.136912	3q13.13	zinc finger, BED domain containing 2
267	209160_at	10	0.03	62	9e-05	AKR1C3	8644	Hs.78183	10p15-p14	aldo-keto reductase family 1, member C3
268	215030_at	10	0.03	9	0.04	GRSF1	2926	Hs.309763	4q13	G-rich RNA sequence binding factor 1
269	217542_at	10	0.03	8	0.03	MGC5370	84825	Hs.484551	12q14.3	hypothetical protein MGC5370
270	219540_at	10	0.03	7	0.03	ZNF267	10308	Hs.460645	16p11.2	zinc finger protein 267
271	205178_s_at	9	0.03	9	0.03	RBBP6	5930	Hs.188553	16p12.2	retinoblastoma binding protein 6
272	205546_s_at	9	0.03	8	0.004	TYK2	7297	Hs.75516	19p13.2	tyrosine kinase 2
273	209764_at	9	0.03	14	0.002	MGAT3	4248	Hs.276808	22q13.1	mannosyl (beta-1,4-)-glycoprotein beta-1,4-N-acetylglucosaminyltransferase
274	214352_s_at	9	0.03	16	0.009	KRAS2	3845	Hs.505033	11p15.5	v-Ha-ras Harvey rat sarcoma viral oncogene homolog
275	202095_s_at	7	0.03	28	0.001	BIRC5	332	Hs.514527	17q25	baculoviral IAP repeat-containing 5 (survivin)
276	203103_s_at	7	0.03	15	0.01	PRP19	27339	Hs.502705	11q12.2	PRP19/PSO4 homolog (S. cerevisiae)
277	209273_s_at	7	0.03	11	0.006	HBLD2	81689	Hs.449291	9q22.1	HESB like domain containing 2
278	202049_s_at	6	0.03	4	0.005	ZNF262	9202	Hs.269211	1p32-p34	zinc finger protein 262
279	203288_at	6	0.03	7	0.003	KIAA0355	9710	Hs.330073	19q13.12	KIAA0355
280	203660_s_at	6	0.03	16	0.008	PCNT2	5116	Hs.474069	21q22.3	pericentrin 2 (kendrin)
281	204259_at	6	0.03	26	0.001	MMP7	4316	Hs.2256	11q21-q22	matrix metalloproteinase 7 (matrilysin, uterine)
282	218098_at	6	0.03	7	0.0003	ARFGEF2	10564	Hs.62578	20q13.13	synaptosomal-associated protein, 23kDa pseudogene
283	218500_at	6	0.03	7	0.02	LOC51337	51337	Hs.368402	8q24.3	mesenchymal stem cell protein DSCD75
284	201164_s_at	5	0.03	2	0.03	PUM1	9698	Hs.281707	1p35.2	pumilio homolog 1 (Drosophila)
285	202597_at	5	0.03	11	0.0006	IRF6	3664	Hs.355827	1q32.3-q41	interferon regulatory factor 6
286	203738_at	5	0.03	5	0.02	FLJ11193	55322	Hs.519246	5p13.3	hypothetical protein FLJ11193
287	218650_at	5	0.03	10	0.001	DGCR8	54487	Hs.533019	22q11.2	DiGeorge syndrome critical region gene 8
288	202469_s_at	4	0.03	5	0.02	CPSF6	11052	Hs.369606	12q14.3	cleavage and polyadenylation specific factor 6, 68kDa
289	204437_s_at	4	0.03	44	0.0008	FOLR1	2348	Hs.73769	11q13.3-q14.1	folate receptor 1 (adult)
290	205419_at	4	0.03	3	0.02	EBI2	1880	Hs.784	13q32.3	Epstein-Barr virus induced gene 2
291	212267_at	4	0.03	4	0.006	KIAA0261	23063	Hs.203099	10q23.31	KIAA0261
292	218053_at	4	0.03	4	0.003	FNBP3	55660	Hs.298735	2q24.1	formin binding protein 3
293	219052_at	4	0.03	4	0.002	HPS6	79803	Hs.125133	10q24.32	Hermansky-Pudlak syndrome 6
294	220305_at	4	0.03	17	7e-05	MGC3260	78993	Hs.134883	20p13	hypothetical protein MGC3260
295	220335_x_at	4	0.03	6	0.005	FLJ21736	79984	Hs.268700	16q22.1	esterase 31
296	200910_at	3	0.03	5	0.007	CCT3	7203	Hs.491494	1q23	chaperonin containing TCP1, subunit 3 (gamma)
297	202198_s_at	3	0.03	5	0.006	MTMR3	8897	Hs.474536	22q12.2	myotubularin related protein 3
298	202610_s_at	3	0.03	3	0.02	CRSP2	9282	Hs.407604	Xp11.4-p11.2	cofactor required for Sp1 transcriptional activation, subunit 2, 150kDa
299	203314_at	3	0.03	4	0.009	GTPBP6	8225	Hs.437145	Xp22.33	pseudoautosomal GTP-binding protein-like
300	203855_at	3	0.03	3	0.02	KIAA0893	22911	Hs.546347	1p13.3	KIAA0893 protein
301	203870_at	3	0.03	3	0.01	USP46	64854	Hs.331478	4q12	ubiquitin specific protease 46
302	205218_at	3	0.03	3	0.01	POLR3F	10621	Hs.472227	20p11.23	polymerase (RNA) III (DNA directed) polypeptide F, 39 kDa
303	205677_s_at	3	0.03	2	0.01	DLEU1	10301	Hs.492218	13q14.3	deleted in lymphocytic leukemia, 1
304	209389_x_at	3	0.03	4	0.0002	DBI	1622	Hs.78888	2q12-q21	diazepam binding inhibitor
305	216246_at	3	0.03	3	0.003	RPS20	6224	Hs.8102	8q12	ribosomal protein S20
306	218046_s_at	3	0.03	10	0.001	MRPS16	51021	Hs.180312	10q22.1	mitochondrial ribosomal protein S16
307	218651_s_at	3	0.03	3	0.04	FLJ11196	55323	Hs.416755	15q22.32	acheron
308	222077_s_at	3	0.03	7	0.006	RACGAP1	29127	Hs.505469	12q13.12	Rac GTPase activating protein 1
309	202592_at	2	0.03	2	0.04	GCN5L1	2647	Hs.94672	12q13-q14	biogenesis of lysosome-related organelles complex-1, subunit 1
310	202598_at	2	0.03	4	0.007	S100A13	6284	Hs.516505	1q21	S100 calcium binding protein A13
311	203175_at	2	0.03	3	0.007	ARHG	391	Hs.501728	11p15.5-p15.4	ras homolog gene family, member G (rho G)
312	203318_s_at	2	0.03	5	0.003	ZNF148	7707	Hs.380334	3q21	zinc finger protein 148 (pHZ-52)
313	203515_s_at	2	0.03	2	0.03	PMVK	10654	Hs.30954	1p13-q23	phosphomevalonate kinase
314	218597_s_at	2	0.03	2	0.003	C10orf70	55847	Hs.370102	10q21.3	chromosome 10 open reading frame 70
315	222138_s_at	2	0.03	2	0.01	WDR13	64743	Hs.521973	Xp11.23	WD repeat domain 13
316	216264_s_at	1	0.03	3	0.003	LAMB2	3913	Hs.439726	3p21	laminin, beta 2 (laminin S)
317	219111_s_at	1	0.03	1	0.006	DDX54	79039	Hs.506861	12q24.21	DEAD (Asp-Glu-Ala-Asp) box polypeptide 54
318	205709_s_at	24	0.04	18	0.05	CDS1	1040	Hs.444924	4q21.23	CDP-diacylglycerol synthase 1
319	221264_s_at	22	0.04	21	0.04	TARDBP	23435	Hs.300624	1p36.22	TAR DNA binding protein
320	219083_at	19	0.04	41	0.01	FLJ10539	55164	Hs.528650	3p14.2	hypothetical protein FLJ10539
321	201903_at	16	0.04	31	0.02	UQCRC1	7384	Hs.119251	3p21.3	ubiquinol-cytochrome c reductase core protein I
322	201970_s_at	12	0.04	14	0.03	NASP	4678	Hs.319334	1p34.1	nuclear autoantigenic sperm protein
323	212909_at	12	0.04	10	0.05	MGC29643	116372	Hs.432395	2q21.2	hypothetical protein MGC29643
324	202589_at	10	0.04	25	0.01	TYMS	7298	Hs.369762	18p11.32	thymidylate synthetase
325	208012_x_at	10	0.04	14	0.02	SP110	3431	Hs.145150	2q37.1	SP110 nuclear body protein
326	212978_at	10	0.04	10	0.003	TA-LRRP	23507	Hs.546355	1p22.2	T-cell activation leucine repeat-rich protein
327	202577_s_at	9	0.04	8	0.04	FLJ11126	55308	Hs.461196	16q22.1	hypothetical protein FLJ11126
328	201351_s_at	8	0.04	10	0.03	YME1L1	10730	Hs.499145	10p14	YME1-like 1 (S. cerevisiae)
329	212531_at	8	0.04	29	0.006	LCN2	3934	Hs.204238	9q34	lipocalin 2 (oncogene 24p3)
330	52731_at	7	0.04	7	0.03	FLJ20294	55626	Hs.546404	11p11.2	hypothetical protein FLJ20294
331	202760_s_at	7	0.04	10	0.02	AKAP2	11217	Hs.259461	9q31-q33	A kinase (PRKA) anchor protein 2
332	209060_x_at	7	0.04	5	0.05	NCOA3	8202	Hs.382168	20q12	nuclear receptor coactivator 3
333	211725_s_at	7	0.04	15	0.008	ENO1	2023	Hs.517145	1p36	enolase 1 (alpha)
334	217627_at	7	0.04	5	0.01	ZNF573	126231	Hs.290703	19q13.13	zinc finger protein 573
335	219328_at	7	0.04	8	0.006	DDX31	64794	Hs.495410	9q34.3	DEAD (Asp-Glu-Ala-Asp) box polypeptide 31
336	220341_s_at	7	0.04	10	0.0006	LOC51149	51149	Hs.310781	5q35.3	truncated calcium binding protein
337	220839_at	7	0.04	13	0.006	HSPC133	29081	Hs.470553	2q31.1	HSPC133 protein
338	203415_at	5	0.04	5	0.02	PDCD6	10016	Hs.379186	5pTER-p15.2	programmed cell death 6
339	213457_at	5	0.04	9	0.01	MFHAS1	9258	Hs.379414	8p23.1	malignant fibrous histiocytoma amplified sequence 1
340	221713_s_at	5	0.04	16	0.003	FLJ12748	79929	Hs.478465	3q27.3	hypothetical protein FLJ12748
341	205986_at	4	0.04	4	0.03	AATK	9625	Hs.514575	17q25.3	apoptosis-associated tyrosine kinase
342	209440_at	4	0.04	4	0.04	PRPS1	5631	Hs.56	Xq21-q27	phosphoribosyl pyrophosphate synthetase 1
343	212271_at	4	0.04	5	0.006	MAPK1	5594	Hs.431850	22q11.2	mitogen-activated protein kinase 1
344	212704_at	4	0.04	3	0.04	ZCCHC11	23318	Hs.476164	1p32.3	zinc finger, CCHC domain containing 11
345	213913_s_at	4	0.04	9	0.005	KIAA0984	23329	Hs.192492	12q14.1	KIAA0984 protein
346	214756_x_at	4	0.04	4	0.03	PMS2L8	5386		7q22.1	postmeiotic segregation increased 2-like 6
347	218371_s_at	4	0.04	3	0.02	PSPC1	55269	Hs.213198	13q12.11	paraspeckle component 1
348	218672_at	4	0.04	11	0.0009	SCNM1	79005	Hs.432360	1q21.3	sodium channel modifier 1
349	219076_s_at	4	0.04	6	0.02	PXMP2	5827	Hs.430299	12q24.33	peroxisomal membrane protein 2, 22kDa
350	200862_at	3	0.04	2	0.03	DHCR24	1718	Hs.498727	1p33-p31.1	24-dehydrocholesterol reductase
351	201625_s_at	3	0.04	2	0.03	INSIG1	3638	Hs.520819	7q36	insulin induced gene 1
352	201671_x_at	3	0.04	3	0.005	USP14	9097	Hs.464416	18p11.32	ubiquitin specific protease 14
353	212322_at	3	0.04	6	0.01	SGPL1	8879	Hs.499984	10q21	sphingosine-1-phosphate lyase 1
354	213764_s_at	3	0.04	11	0.04	MFAP5	8076	Hs.512842	12p13.1-p12.3	microfibrillar associated protein 5
355	218037_at	3	0.04	4	0.02	C2orf17	79137	Hs.516707	2q36.1	chromosome 2 open reading frame 17
356	218726_at	3	0.04	9	0.0006	DKFZp762E1312	55355	Hs.532968	2q37.2	hypothetical protein DKFZp762E1312
357	221175_at	3	0.04	3	0.004	FLJ22173	80111	Hs.287691	3q22.1	hypothetical protein FLJ22173
358	38710_at	2	0.04	3	0.04	OTUB1	55611	Hs.473788	11q13.1	OTU domain, ubiquitin aldehyde binding 1
359	201428_at	2	0.04	5	0.002	CLDN4	1364	Hs.520942	7q11.23	claudin 4
360	202161_at	2	0.04	7	0.0007	PRKCL1	5585	Hs.466044	19p13.1-p12	protein kinase C-like 1
361	208110_x_at	2	0.04	2	0.005	MED25	81857	Hs.467128	19q13.3	ARC/mediator transcriptional coactivator subunit
362	212807_s_at	2	0.04	9	0.002	SORT1	6272	Hs.485195	1p21.3-p13.1	sortilin 1
363	216843_x_at	2	0.04	2	0.009	PMS2L2	5380	Hs.292996	7q11-q22	postmeiotic segregation increased 2-like 2
364	218372_at	2	0.04	2	0.04	MED9	55090	Hs.244595	17p11.2	mediator subunit 25
365	218820_at	2	0.04	3	0.01	C14orf132	56967	Hs.6434	14q32.2	chromosome 14 open reading frame 132
366	41856_at	1	0.04	2	0.01	UNC5B	219699	Hs.522997	10q22.2	unc-5 homolog B (C. elegans)
367	205633_s_at	12	0.05	9	0.01	ALAS1	211	Hs.476308	3p21.1	aminolevulinate, delta-, synthase 1
368	202514_at	11	0.05	21	0.0007	DLG1	1739	Hs.292549	3q29	discs, large homolog 1 (Drosophila)
369	218979_at	10	0.05	8	0.04	C9orf76	80010	Hs.284137	9q22.1	chromosome 9 open reading frame 76
370	208984_x_at	6	0.05	10	5e-05	RBM10	8241	Hs.401509	Xp11.23	RNA binding motif protein 10
371	219734_at	6	0.05	13	0.01	FLJ20174	54847	Hs.272416	3q13.31	hypothetical protein FLJ20174
372	200956_s_at	5	0.05	6	0.05	SSRP1	6749	Hs.523680	11q12	structure specific recognition protein 1
373	208679_s_at	5	0.05	18	0.009	ARPC2	10109	Hs.529303	2q36.1	actin related protein 2/3 complex, subunit 2, 34kDa
374	214164_x_at	5	0.05	9	0.02	AP1G1	164	Hs.461253	15q22	carbonic anhydrase XII
375	214439_x_at	5	0.05	5	0.04	BIN1	274	Hs.193163	2q14	bridging integrator 1
376	201756_at	4	0.05	4	0.005	RPA2	6118	Hs.79411	1p35	replication protein A2, 32kDa
377	203315_at	4	0.05	4	0.04	NCK2	8440	Hs.529244	2q12	NCK adaptor protein 2
378	206412_at	4	0.05	4	0.03	FER	2241	Hs.221472	5q21	fer (fps/fes related) tyrosine kinase
379	209150_s_at	4	0.05	4	0.005	TM9SF1	10548	Hs.91586	14q11.2	transmembrane 9 superfamily member 1
380	213785_at	4	0.05	7	0.02	IPO9	55705	Hs.497384	1q32.1	importin 9
381	218219_s_at	4	0.05	9	0.009	LANCL2	55915	Hs.224282	7q31.1-q31.33	LanC lantibiotic synthetase component C-like 2 (bacterial)
382	213507_s_at	3	0.05	4	0.03	KPNB1	3837	Hs.532793	17q21.32	karyopherin (importin) beta 1
383	215521_at	3	0.05	3	0.05	PHC3	80012	Hs.546441	3q26.31	polyhomeotic like 3 (Drosophila)
384	219756_s_at	3	0.05	5	0.002	POF1B	79983	Hs.267038	Xq21.2	premature ovarian failure, 1B
385	201038_s_at	2	0.05	3	0.006	ANP32A	8125	Hs.458747	15q22.3-q23	acidic nuclear phosphoprotein 32 family, member A
386	206750_at	2	0.05	3	0.008	MAFK	7975	Hs.520612	7p22.3	v-maf musculoaponeurotic fibrosarcoma oncogene homolog K
387	208913_at	2	0.05	4	0.005	GGA2	23062	Hs.460336	16p12	golgi associated, gamma adaptin ear containing, ARF binding protein 2
388	212171_x_at	2	0.05	2	0.003	VEGF	7422	Hs.73793	6p12	vascular endothelial growth factor
389	214672_at	2	0.05	2	0.01	KIAA0998	23093	Hs.200747	14q24.3	KIAA0998
390	219940_s_at	2	0.05	2	0.002	FLJ11305	55795	Hs.508769	13q34	hypothetical protein FLJ11305
391	220488_s_at	2	0.05	2	0.04	BCAS3	54828	Hs.463702	17q23	breast carcinoma amplified sequence 3
List No.	Probe Set	FC(C)	P(C)	FC(T)	P(T)	Gene Symbol	Gene ID	Unigene	Chromosome	Description
392	217250_s_at	-7	5e-05	-13	0.0006	CHD5	26038	Hs.522898	1p36.23	chromodomain helicase DNA binding protein 5
393	216541_x_at	-7	7e-05	-7	0.05	IGHG1	3500	Hs.375600	14q32.33	immunoglobulin heavy constant gamma 1
394	212342_at	-5	7e-05	-3	0.01	MGC21416	286451	Hs.82719	Xq13.1	hypothetical protein MGC21416
395	205304_s_at	-20	0.0001	-26	0.001	KCNJ8	3764	Hs.102308	12p11.23	potassium inwardly-rectifying channel, subfamily J, member 8
396	215439_x_at	-3	0.0002	-4	0.002	SYNPO2	171024	Hs.480615	4q26	synaptopodin 2
397	208353_x_at	-3	0.0003	-5	0.009	ANK1	286	Hs.491558	8p11.1	ankyrin 1, erythrocytic
398	211296_x_at	-2	0.0007	-3	0.003	UBC	7316	Hs.520348	2p16	ribosomal protein S27a
399	212225_at	-51	0.0009	-24	0.003	SUI1	10209	Hs.150580	17q21.31	putative translation initiation factor
400	219391_at	-6	0.0009	-8	0.01	BPNT1	10380	Hs.406134	1q42.11	3'(2'), 5'-bisphosphate nucleotidase 1
401	207574_s_at	-13	0.001	-6	0.007	GADD45B	4616	Hs.110571	19p13.3	growth arrest and DNA-damage-inducible, beta
402	202992_at	-3	0.001	-159	8e-06	C7	730	Hs.78065	5p13	complement component 7
403	209189_at	-3	0.001	-84	0.008	FOS	2353	Hs.25647	14q24.3	v-fos FBJ murine osteosarcoma viral oncogene homolog
404	218224_at	-3	0.001	-3	0.04	PNMA1	9240	Hs.194709	14q24.2	paraneoplastic antigen MA1
405	206032_at	-23	0.002	-14	0.004	DSC3	1825	Hs.41690	18q12.1	desmocollin 3
406	210904_s_at	-13	0.002	-2	0.04	IL13RA1	3597	Hs.496646	Xq24	interleukin 13 receptor, alpha 1
407	214484_s_at	-11	0.002	-5	0.04	OPRS1	10280	Hs.522087	9p13.2	opioid receptor, sigma 1
408	214640_at	-10	0.002	-24	0.001	UNC93A	54346	Hs.267749	6q27	unc-93 homolog A (C. elegans)
409	201328_at	-5	0.002	-3	0.01	ETS2	2114	Hs.517296	21q22.3	v-ets erythroblastosis virus E26 oncogene homolog 2
410	201842_s_at	-5	0.002	-14	0.001	EFEMP1	2202	Hs.76224	2p16	EGF-containing fibulin-like extracellular matrix protein 1
411	209335_at	-5	0.002	-74	0.02	DCN	1634	Hs.156316	12q13.2	decorin
412	222172_at	-4	0.002	-7	0.004	NPAS3	64067	Hs.509113	14q12-q13	neuronal PAS domain protein 3
413	201010_s_at	-3	0.002	-9	0.003	TXNIP	10628	Hs.533977	1q21.2	thioredoxin interacting protein
414	201560_at	-3	0.002	-6	0.008	CLIC4	25932	Hs.440544	1p36.11	chloride intracellular channel 4
415	206332_s_at	-3	0.002	-6	0.002	IFI16	3428	Hs.380250	1q22	interferon, gamma-inducible protein 16
416	207545_s_at	-3	0.002	-4	0.01	NUMB	8650	Hs.509909	14q24.3	numb homolog (Drosophila)
417	211476_at	-3	0.002	-4	0.004	MYOZ2	51778	Hs.381047	4q26-q27	myozenin 2
418	212812_at	-3	0.002	-4	0.007	FLJ22642		Hs.288232	5	cDNA FLJ22642
419	213933_at	-28	0.003	-2	0.02	PTGER3	5733	Hs.445000	1p31.2	prostaglandin E receptor 3 (subtype EP3)
420	201185_at	-3	0.003	-6	0.009	PRSS11	5654	Hs.501280	10q26.3	protease, serine, 11 (IGF binding)
421	218501_at	-3	0.003	-2	0.02	ARHGEF3	50650	Hs.476402	3p21-p13	Rho guanine nucleotide exchange factor (GEF) 3
422	201445_at	-2	0.003	-5	0.0002	CNN3	1266	Hs.483454	1p22-p21	calponin 3, acidic
423	220273_at	-2	0.003	-2	0.05	IL17B	27190	Hs.409558	5q32-34	interleukin 17B
424	203074_at	-28	0.004	-23	0.0002	ANXA8	244	Hs.463110	10q11.2	annexin A8
425	219304_s_at	-18	0.004	-18	0.01	PDGFD	80310	Hs.352298	11q22.3	platelet derived growth factor D
426	222168_at	-17	0.004	-3	0.03	ALDH1A3	220	Hs.459538	15q26.3	aldehyde dehydrogenase 1 family, member A3
427	201269_s_at	-9	0.004	-5	0.03	KIAA1068	23386	Hs.488171	7p13-p12	KIAA1068 protein
428	203178_at	-4	0.004	-22	0.0002	GATM	2628	Hs.75335	15q15.1	glycine amidinotransferase
429	222210_at	-3	0.004	-3	0.004	CASKIN2	57513	Hs.274408	17q25.3	CASK interacting protein 2
430	221872_at	-9	0.005	-13	0.03	RARRES1	5918	Hs.131269	3q25.32	retinoic acid receptor responder (tazarotene induced) 1
431	217767_at	-8	0.005	-5	0.01	C3	718	Hs.529053	19p13.3-p13.2	complement component 3
432	211872_s_at	-6	0.005	-8	0.003	RGS11	8786	Hs.65756	16p13.3	regulator of G-protein signalling 11
433	208441_at	-2	0.005	-2	0.0007	IGF1R	3480	Hs.20573	15q26.3	insulin-like growth factor 1 receptor
434	222151_s_at	-2	0.005	-2	0.04	FLJ13386	80254	Hs.443301	3q22.1	hypothetical protein FLJ13386
435	209763_at	-15	0.006	-22	0.002	CHRDL1	91851	Hs.496587	Xq23	chordin-like 1
436	204457_s_at	-10	0.006	-8	0.04	GAS1	2619	Hs.65029	9q21.3-q22	growth arrest-specific 1
437	220664_at	-8	0.006	-7	0.007	SPRR2C	6702	Hs.2421	1q21-q22	small proline-rich protein 2B
438	201666_at	-6	0.006	-4	0.008	TIMP1	7076	Hs.522632	Xp11.3-p11.23	tissue inhibitor of metalloproteinase 1
439	209699_x_at	-5	0.006	-2	0.04	AKR1C2	1646	Hs.460260	10p15-p14	aldo-keto reductase family 1, member C1
440	32541_at	-2	0.006	-3	0.004	PPP3CC	5533	Hs.149413	8p21.2	protein phosphatase 3, catalytic subunit
441	210690_at	-15	0.007	-4	0.04	KLRC4	8302	Hs.268510	12p13.2-p12.3	killer cell lectin-like receptor subfamily C, member 4
442	207269_at	-9	0.007	-4	0.008	DEFA4	1669	Hs.2582	8p23	defensin, alpha 4, corticostatin
443	203483_at	-7	0.007	-4	0.05	C10orf6	55719	Hs.447458	10q24.32	sema domain, 4G
444	214122_at	-6	0.007	-4	0.006	PDLIM7	9260	Hs.533040	5q35.3	PDZ and LIM domain 7 (enigma)
445	218718_at	-5	0.007	-19	0.002	PDGFC	56034	Hs.148162	4q32	platelet derived growth factor C
446	201315_x_at	-4	0.007	-2	0.008	IFITM2	10581	Hs.174195	11p15.5	interferon induced transmembrane protein 3 (1-8U)
447	205008_s_at	-4	0.007	-3	0.03	CIB2	10518	Hs.129867	15q24	calcium and integrin binding family member 2
448	207919_at	-2	0.007	-2	0.004	ART1	417	Hs.382188	11p15	ADP-ribosyltransferase 1
449	210301_at	-2	0.007	-2	0.01	XDH	7498	Hs.250	2p23-p22	xanthine dehydrogenase
450	221841_s_at	-15	0.008	-35	0.0002	KLF4	9314	Hs.376206	9q31	Kruppel-like factor 4 (gut)
451	203973_s_at	-4	0.008	-3	0.04	CEBPD	1052	Hs.440829	8p11.2-p11.1	CCAAT/enhancer binding protein (C/EBP), delta
452	206534_at	-4	0.008	-3	0.02	GRIN2A	2903	Hs.411472	16p13.2	glutamate receptor, ionotropic, N-methyl D-aspartate 2A
453	211457_at	-4	0.008	-6	0.04	GABARAPL3	23766	Hs.546646	12p13.31	GABA(A) receptor-associated protein like 1
454	206000_at	-2	0.008	-4	0.007	MEP1A	4224	Hs.179704	6p12-p11	meprin A, alpha (PABA peptide hydrolase)
455	220053_at	-2	0.008	-2	0.05	GDF3	9573	Hs.86232	12p13.1	growth differentiation factor 3
456	222176_at	-5	0.009	-11	0.0004	PTEN	5728	Hs.500466	10q23.3	phosphatase and tensin homolog
457	203934_at	-4	0.009	-13	0.01	KDR	3791	Hs.479756	4q11-q12	kinase insert domain receptor
458	208623_s_at	-4	0.009	-4	0.005	VIL2	7430	Hs.487027	6q25.2-q26	villin 2 (ezrin)
459	217058_at	-3	0.009	-3	0.02	GNAS	2778	Hs.125898	20q13.2-q13.3	GNAS complex locus
460	200012_x_at	-1	0.009	-6	2e-05	RPL21	6144	Hs.381123	4q12	similar to 60S ribosomal protein L21
461	204749_at	-18	0.01	-16	0.008	NAP1L3	4675	Hs.21365	Xq21.3-q22	nucleosome assembly protein 1-like 3
462	217452_s_at	-18	0.01	-15	0.05	B3GALT2	8707	Hs.518834	1q31	UDP-Gal:betaGlcNAc beta 1,3-galactosyltransferase, polypeptide 2
463	204059_s_at	-9	0.01	-17	0.006	ME1	4199	Hs.21160	6q12	malic enzyme 1, NADP(+)-dependent, cytosolic
464	206634_at	-8	0.01	-9	0.02	SIX3	6496	Hs.227277	2p16-p21	sine oculis homeobox homolog 3 (Drosophila)
465	204306_s_at	-7	0.01	-5	0.02	CD151	977	Hs.512857	11p15.5	CD151 antigen
466	215981_at	-7	0.01	-10	0.007	DLEU7	220107	Hs.285829	13q14.3	Deleted in lymphocytic leukemia 7
467	219196_at	-7	0.01	-4	0.05	SCG3	29106	Hs.232618	15q21	secretogranin III
468	216420_at	-6	0.01	-4	0.03	TARDBPL	128682		20p12.3	TAR DNA binding protein-like
469	201280_s_at	-5	0.01	-20	0.02	DAB2	1601	Hs.481980	5p13	disabled homolog 2, mitogen-responsive phosphoprotein
470	211866_x_at	-5	0.01	-4	0.04	HFE	3077	Hs.233325	6p21.3	hemochromatosis
471	200891_s_at	-4	0.01	-4	0.01	SSR1	6745	Hs.114033	6p24.3	signal sequence receptor, alpha
472	202340_x_at	-4	0.01	-4	0.007	NR4A1	3164	Hs.524430	12q13	nuclear receptor subfamily 4, group A, member 1
473	205577_at	-4	0.01	-6	0.003	PYGM	5837	Hs.154084	11q12-q13.2	phosphorylase, glycogen; muscle
474	209854_s_at	-4	0.01	-3	0.02	KLK2	3817	Hs.515560	19q13.41	kallikrein 2, prostatic
475	204467_s_at	-3	0.01	-16	0.009	SNCA	6622	Hs.271771	4q21	synuclein, alpha (non A4 component of amyloid precursor)
476	204864_s_at	-3	0.01	-5	0.0003	IL6ST	3572	Hs.532082	5q11	interleukin 6 signal transducer
477	204976_s_at	-3	0.01	-2	0.03	AMMECR1	9949	Hs.211021	Xq22.3	Alport syndrome
478	205990_s_at	-3	0.01	-16	0.002	WNT5A	7474	Hs.152213	3p21-p14	wingless-type MMTV integration site family, member 5A
479	208410_x_at	-3	0.01	-3	0.003	AMELX	265	Hs.46329	Xp22.31-p22.1	amelogenin (amelogenesis imperfecta 1, X-linked)
480	209001_s_at	-3	0.01	-2	0.02	ANAPC13	25847	Hs.106909	3q22.1	anaphase promoting complex subunit 13
481	212244_at	-3	0.01	-3	0.02	GRINL1A	81488	Hs.437256	15q22.1	glutamate receptor, ionotropic, N-methyl D-aspartate-like 1A
482	215675_at	-3	0.01	-3	0.01	KIAA1655	85370	Hs.181159	22	KIAA1655 protein
483	217590_s_at	-3	0.01	-5	0.02	TRPA1	8989	Hs.137674	8q13	transient receptor potential cation channel, subfamily A, member 1
484	202920_at	-2	0.01	-2	0.03	ANK2	287	Hs.137367	4q25-q27	ankyrin 2, neuronal
485	205528_s_at	-2	0.01	-6	0.01	CBFA2T1	862	Hs.368431	21q22.3	runt-related transcription factor 1
486	209779_at	-2	0.01	-5	0.003	MGC14817	84298	Hs.504820	12q14.2	hypothetical protein MGC14817
487	212777_at	-2	0.01	-2	0.03	SOS1	6654	Hs.278733	2p22-p21	son of sevenless homolog 1 (Drosophila)
488	212818_s_at	-2	0.01	-2	0.02	ASB1	51665	Hs.516788	2q37	ankyrin repeat and SOCS box-containing 1
489	217539_at	-2	0.01	-1	0.03	C18orf25	147339	Hs.116486	18q21.1	chromosome 18 open reading frame 25
490	220683_at	-2	0.01	-2	0.03	RDH8	50700	Hs.272405	19p13.2-p13.3	retinol dehydrogenase 8 (all-trans)
491	204755_x_at	-32	0.02	-27	0.02	HLF	3131	Hs.196952	17q22	hepatic leukemia factor
492	205626_s_at	-30	0.02	-39	0.02	CALB1	793	Hs.65425	8q21.3-q22.1	calbindin 1, 28kDa
493	211276_at	-20	0.02	-55	0.001	TCEAL2	140597	Hs.401835	Xq22.1-q22.3	my048 protein
494	206581_at	-18	0.02	-24	0.008	BNC	646	Hs.459153	15q25.1	basonuclin 1
495	204364_s_at	-13	0.02	-52	0.01	C2orf23	65055	Hs.368884	2p11.2	chromosome 2 open reading frame 23
496	203851_at	-12	0.02	-6	0.03	IGFBP6	3489	Hs.274313	12q13	insulin-like growth factor binding protein 6
497	207480_s_at	-11	0.02	-4	0.002	MEIS2	4212	Hs.510989	15q13.3	Meis1, myeloid ecotropic viral integration site 1 homolog 2
498	221766_s_at	-8	0.02	-4	0.04	C6orf37	55603	Hs.10784	6q14	chromosome 6 open reading frame 37
499	201117_s_at	-7	0.02	-5	0.004	CPE	1363	Hs.75360	4q32.3	carboxypeptidase E
500	207826_s_at	-7	0.02	-19	5e-05	ID3	3399	Hs.76884	1p36.13-p36.12	inhibitor of DNA binding 3, dominant negative helix-loop-helix protein
501	214247_s_at	-6	0.02	-15	0.03	DKK3	27122	Hs.292156	11p15.2	dickkopf homolog 3 (Xenopus laevis)
502	200986_at	-5	0.02	-2	0.04	SERPING1	710	Hs.384598	11q12-q13.1	serine proteinase inhibitor, clade G, member 1
503	209113_s_at	-5	0.02	-4	0.03	HMG20B	10362	Hs.406534	19p13.3	high-mobility group 20B
504	217429_at	-5	0.02	-2	0.02	TTLL2	83887	Hs.520554	6q27	tubulin tyrosine ligase-like family, member 2
505	218729_at	-5	0.02	-9	0.02	LXN	56925	Hs.478067	3q25.32	latexin
506	200953_s_at	-4	0.02	-19	0.005	CCND2	894	Hs.376071	12p13	cyclin D2
507	201508_at	-4	0.02	-2	0.0001	IGFBP4	3487	Hs.462998	17q12-q21.1	insulin-like growth factor binding protein 4
508	203941_at	-4	0.02	-2	0.05	FLJ10871	55756	Hs.162397	8p21.1	hypothetical protein FLJ10871
509	207595_s_at	-4	0.02	-4	0.02	BMP1	649	Hs.1274	8p21	bone morphogenetic protein 1
510	208933_s_at	-4	0.02	-4	0.03	WAC	51322	Hs.435610	1q42-q43	lectin, galactoside-binding, soluble, 8 (galectin 8)
511	211469_s_at	-4	0.02	-5	0.02	CXCR6	10663	Hs.34526	3p21	chemokine (C-X-C motif) receptor 6
512	211959_at	-4	0.02	-6	0.04	IGFBP5	3488	Hs.369982	2q33-q36	insulin-like growth factor binding protein 5
513	202388_at	-3	0.02	-8	0.005	RGS2	5997	Hs.78944	1q31	regulator of G-protein signalling 2, 24kDa
514	202518_at	-3	0.02	-2	0.02	BCL7B	9275	Hs.408219	7q11.23	B-cell CLL/lymphoma 7B
515	202581_at	-3	0.02	-4	0.02	HSPA1B	3304	Hs.274402	6q14.1	chemokine (C-C motif) receptor 5
516	203789_s_at	-3	0.02	-4	0.02	SEMA3C	10512	Hs.269109	7q21-q31	sema domain, 3C
517	207001_x_at	-3	0.02	-3	0.03	DSIPI	1831	Hs.522074	Xq22.3	delta sleep inducing peptide, immunoreactor
518	208451_s_at	-3	0.02	-4	0.03	C4B	721	Hs.546241	6p21.3	complement component 4A
519	212096_s_at	-3	0.02	-15	0.006	MTUS1	57509	Hs.7946	8p22	mitochondrial tumor suppressor 1
520	212615_at	-3	0.02	-6	0.005	FLJ12178	80205	Hs.530936	16q12.2	hypothetical protein FLJ12178
521	216481_at	-3	0.02	-7	0.0004	GRIP2	80852	Hs.517819	3p24-p23	glutamate receptor interacting protein 2
522	200902_at	-2	0.02	-4	0.005	SEP15	9403	Hs.362728	1p31	15 kDa selenoprotein
523	201565_s_at	-2	0.02	-3	0.05	ID2	3398	Hs.180919	2p25	inhibitor of DNA binding 2, dominant negative helix-loop-helix protein
524	201778_s_at	-2	0.02	-3	0.0008	KIAA0494	9813	Hs.100874	1pTER-p22.1	KIAA0494 gene product
525	203188_at	-2	0.02	-2	0.02	B3GNT6	11041	Hs.8526	11q13.1	UDP-GlcNAc:betaGal beta-1,3-N-acetylglucosaminyltransferase 6
526	207609_s_at	-2	0.02	-3	0.006	CYP1A2	1544	Hs.1361	15q22-qTER	cytochrome P450, family 1, subfamily A, polypeptide 2
527	208593_x_at	-2	0.02	-2	0.03	CRHR1	1394	Hs.417628	17q12-q22	corticotropin releasing hormone receptor 1
528	209735_at	-2	0.02	-3	0.03	ABCG2	9429	Hs.480218	4q22	ATP-binding cassette, sub-family G (WHITE), member 2
529	209880_s_at	-2	0.02	-4	0.002	SELPLG	6404	Hs.506670	12q24	selectin P ligand
530	211316_x_at	-2	0.02	-2	0.03	CFLAR	8837	Hs.390736	2q33-q34	CASP8 and FADD-like apoptosis regulator
531	213029_at	-2	0.02	-2	0.02	NFIB	4781	Hs.370359	9p24.1	nuclear factor I/B
532	214780_s_at	-2	0.02	-2	0.01	MYO9B	4650	Hs.123198	19p13.1	myosin IXB
533	221844_x_at	-2	0.02	-3	0.009	ZNF574	64763	Hs.13323	19q13.31	zinc finger protein 574
534	207124_s_at	-28	0.03	-25	0.04	GNB5	10681	Hs.155090	15q21.1	guanine nucleotide binding protein (G protein), beta 5
535	204622_x_at	-12	0.03	-15	0.005	NR4A2	4929	Hs.165258	2q22-q23	nuclear receptor subfamily 4, group A, member 2
536	207010_at	-8	0.03	-18	0.007	GABRB1	2560	Hs.27283	4p12	gamma-aminobutyric acid (GABA) A receptor, beta 1
537	215021_s_at	-8	0.03	-8	0.03	NRXN3	9369	Hs.368307	14q31	neurexin 3
538	219640_at	-7	0.03	-14	0.003	CLDN15	24146	Hs.38738	7q11.22	claudin 15
539	220843_s_at	-7	0.03	-2	0.04	DKFZP564O0463	25879	Hs.532265	8q22.3	DKFZP564O0463 protein
540	203930_s_at	-6	0.03	-4	0.002	MAPT	4137	Hs.101174	17q21.1	microtubule-associated protein tau
541	205946_at	-6	0.03	-14	0.006	VIPR2	7434	Hs.490817	7q36.3	vasoactive intestinal peptide receptor 2
542	214515_at	-5	0.03	-3	0.02	OR1E1	8387	Hs.278485	17p13.3	olfactory receptor, family 1, subfamily E, member 1
543	220665_at	-5	0.03	-4	0.05	LUZP4	51213	Hs.242183	Xq24	HOM-TES-85 tumor antigen
544	202990_at	-4	0.03	-3	0.04	PYGL	5836	Hs.282417	14q21-q22	phosphorylase, glycogen; liver
545	216464_x_at	-4	0.03	-4	0.03	GPR44	11251	Hs.299567	11q12-q13.3	G protein-coupled receptor 44
546	216719_s_at	-4	0.03	-10	0.007	RAB11FIP4	84440	Hs.406788	4q25	RAB11 family interacting protein 4 (class II)
547	202081_at	-3	0.03	-2	0.05	IER2	9592	Hs.501629	19p13.13	immediate early response 2
548	202552_s_at	-3	0.03	-19	9e-07	CRIM1	51232	Hs.332847	2p21	cysteine-rich motor neuron 1
549	202704_at	-3	0.03	-6	0.002	TOB1	10140	Hs.531550	17q21	transducer of ERBB2, 1
550	210540_s_at	-3	0.03	-3	0.03	B4GALT4	8702	Hs.13225	3q13.3	UDP-Gal:betaGlcNAc beta 1,4- galactosyltransferase, polypeptide 4
551	213056_at	-3	0.03	-5	0.04	FRMD4B	23150	Hs.371681	3p14.2	GRP1-binding protein GRSP1
552	214905_at	-3	0.03	-6	0.02	LOC145899	145899	Hs.459035	15q24.2	hypothetical protein LOC145899
553	217252_at	-3	0.03	-3	0.02	OSIL	54211			oxidative stress induced like
554	202192_s_at	-2	0.03	-2	0.03	GAS7	8522	Hs.462214	17p13.1	growth arrest-specific 7
555	202822_at	-2	0.03	-2	0.04	LPP	4026	Hs.444362	3q27-q28	LIM domain containing preferred translocation partner in lipoma
556	204872_at	-2	0.03	-21	0.002	TLE4	7091	Hs.444213	9q21.32	transducin-like enhancer of split 4
557	205233_s_at	-2	0.03	-2	0.02	PAFAH2	5051	Hs.477083	1p34.3	platelet-activating factor acetylhydrolase 2, 40kDa
558	206658_at	-2	0.03	-2	0.01	UPK3B	80761	Hs.488861	7q11.2	uroplakin 3B
559	207395_at	-2	0.03	-2	0.03	BTN1A1	696	Hs.153058	6p22.1	butyrophilin, subfamily 1, member A1
560	209535_s_at	-2	0.03	-2	0.03	AKAP13	11214	Hs.459211	15q24-q25	A kinase (PRKA) anchor protein 13
561	210734_x_at	-2	0.03	-2	0.03	MAX	4149	Hs.285354	14q23	MAX protein
562	210894_s_at	-2	0.03	-1	0.003	CEP2	11190	Hs.443976	20q11.22-q12	centrosomal protein 2
563	212067_s_at	-2	0.03	-2	0.005	C1R	715	Hs.524224	12p13	complement component 1, r subcomponent
564	215337_at	-2	0.03	-3	0.02	THRAP4	9862	Hs.462983	17q21.2	thyroid hormone receptor associated protein 4
565	221493_at	-2	0.03	-8	0.0004	TSPYL	7259	Hs.458358	6q22-q23	TSPY-like 1
566	200025_s_at	-1	0.03	-2	0.04	RPL27	6155	Hs.514196	17q21.1-q21.2	ribosomal protein L27
567	217689_at	-1	0.03	-2	0.05	PTPN1	5770	Hs.417549	20q13.1-q13.2	protein tyrosine phosphatase, non-receptor type 1
568	212822_at	-9	0.04	-7	0.02	HEG	57493	Hs.477420	3q21.2	HEG homolog
569	219601_s_at	-8	0.04	-7	0.02	C10orf12	26148	Hs.14555	10q24.2	chromosome 10 open reading frame 12
570	202393_s_at	-7	0.04	-10	0.03	TIEG	7071	Hs.435001	8q22.2	TGFB inducible early growth response
571	218499_at	-7	0.04	-7	0.007	MST4	51765	Hs.444247	Xq26.2	Mst3 and SOK1-related kinase
572	215879_at	-6	0.04	-16	0.002	ITGB1	3688	Hs.429052	10p11.2	integrin, beta 1
573	210450_at	-5	0.04	-10	0.01	LOC90925	90925	Hs.81221	14q32.33	hypothetical protein LOC90925
574	214216_s_at	-5	0.04	-5	0.03	KIAA0217	23185	Hs.498455	10p15.3	KIAA0217
575	214270_s_at	-5	0.04	-4	0.03	MAPRE3	22924	Hs.515860	2p23.3-p23.1	microtubule-associated protein, RP/EB family, member 3
576	221389_at	-4	0.04	-11	0.001	PLA2G2E	30814	Hs.272372	1p36.13	phospholipase A2, group IIE
577	222126_at	-4	0.04	-2	0.03	IRS3L	3668	Hs.521083	7q22.1	HIV-1 Rev binding protein-like
578	204041_at	-3	0.04	-15	0.01	MAOB	4129	Hs.46732	Xp11.23	monoamine oxidase B
579	210002_at	-3	0.04	-5	0.004	GATA6	2627	Hs.514746	18q11.1-q11.2	GATA binding protein 6
580	214725_at	-3	0.04	-5	0.02	RPESP	157869	Hs.439040	8q13.3	RPE-spondin
581	215816_at	-3	0.04	-4	0.05	IGLL2	3544		22q11.2	immunoglobulin lambda-like polypeptide 2
582	216577_at	-3	0.04	-2	0.005	RPS11P1	128718		20p12.2	ribosomal protein S11, pseudogene 1
583	219948_x_at	-3	0.04	-7	0.03	FLJ21934	79799	Hs.122583	4q13.3	hypothetical protein FLJ21934
584	220913_at	-3	0.04	-5	0.01	MGRN1	23295	Hs.526494	16p13.3	Hypothetical protein FLJ21497
585	200732_s_at	-2	0.04	-12	0.01	PTP4A1	7803	Hs.227777	6q12	protein tyrosine phosphatase type IVA, member 1
586	201020_at	-2	0.04	-3	0.02	YWHAH	7533	Hs.226755	22q12.3	tyrosine 3-monooxygenase/tryptophan 5-monooxygenase activation protein
587	201409_s_at	-2	0.04	-3	0.009	PPP1CB	5500	Hs.468018	2p23	protein phosphatase 1, catalytic subunit, beta isoform
588	201738_at	-2	0.04	-6	0.002	GC20	10289	Hs.315230	3p21.33	translation factor sui1 homolog
589	202378_s_at	-2	0.04	-2	0.04	LEPROT	54741	Hs.23581	1p31.3	leptin receptor gene-related protein
590	203139_at	-2	0.04	-5	0.0007	DAPK1	1612	Hs.380277	9q34.1	death-associated protein kinase 1
591	204934_s_at	-2	0.04	-3	0.04	HPN	3249	Hs.182385	19q11-q13.2	hepsin (transmembrane protease, serine 1)
592	207585_s_at	-2	0.04	-2	0.02	RPL36AL	6166	Hs.444749	11p15.1	ribosomal protein L36a-like
593	207825_s_at	-2	0.04	-4	0.007	GHRHR	2692	Hs.767	7p14	growth hormone releasing hormone receptor
594	210090_at	-2	0.04	-2	0.02	ARC	23237	Hs.40888	8q24.3	activity-regulated cytoskeleton-associated protein
595	210276_s_at	-2	0.04	-2	0.02	HRIHFB2122	11078	Hs.533030	22q13.1	Tara-like protein
596	212071_s_at	-2	0.04	-3	0.002	SPTBN1	6711	Hs.503178	2p21	spectrin, beta, non-erythrocytic 1
597	213946_s_at	-2	0.04	-2	0.04	KIAA0657	23363	Hs.526594	2q36.1	KIAA0657 protein
598	215577_at	-2	0.04	-2	0.007	UBE2E1	7324	Hs.164853	3p24.2-p24.1	ubiquitin-conjugating enzyme E2E 1
599	216033_s_at	-2	0.04	-2	0.02	FYN	2534	Hs.390567	6q21	FYN oncogene related to SRC, FGR, YES
600	217029_at	-2	0.04	-2	0.02	BAX	581	Hs.159428	19q13.3-q13.4	BCL2-associated X protein
601	217160_at	-2	0.04	-2	0.03	TSPY	7258	Hs.458252	Yp11.2	testis specific protein, Y-linked 1
602	219614_s_at	-2	0.04	-6	0.03	SLC6A20	54716	Hs.413095	3p21.3	solute carrier family 6, member 20
603	200945_s_at	-1	0.04	-3	0.01	SEC31L1	22872	Hs.370024	4q21.3	SEC31-like 1 (S. cerevisiae)
604	209018_s_at	-1	0.04	-2	0.02	PINK1	65018	Hs.389171	1p36	PTEN induced putative kinase 1
605	209808_x_at	-1	0.04	-2	0.03	ING1	3621	Hs.46700	13q34	inhibitor of growth family, member 1
606	217999_s_at	-10	0.05	-7	0.04	PHLDA1	22822	Hs.82101	12q15	pleckstrin homology-like domain, family A, member 1
607	207182_at	-4	0.05	-3	0.03	GABRA6	2559	Hs.90791	5q34	gamma-aminobutyric acid (GABA) A receptor, alpha 6
608	217721_at	-4	0.05	-2	0.03	CDC10	989	Hs.191346	7p14.3-p14.1	CDC10 cell division cycle 10 homolog (S. cerevisiae)
609	220648_at	-4	0.05	-9	0.003	ADARB2	105	Hs.369716	10p15.3	adenosine deaminase, RNA-specific, B2
610	210986_s_at	-3	0.05	-3	0.04	TPM1	7168	Hs.133892	15q22.1	tropomyosin 1 (alpha)
611	211008_s_at	-3	0.05	-5	0.01	UBE2I	7329	Hs.302903	16p13.3	ubiquitin-conjugating enzyme E2I
612	213376_at	-3	0.05	-7	0.0006	ZBTB1	22890	Hs.400802	14q23.3	zinc finger and BTB domain containing 1
613	215345_x_at	-3	0.05	-5	0.02	LOC442533		Hs.373504	7	similar to T-cell receptor gamma chain V region PT-gamma-1/2 precursor
614	221463_at	-3	0.05	-12	0.002	CCL24	6369	Hs.247838	7q11.23	chemokine (C-C motif) ligand 24
615	200741_s_at	-2	0.05	-4	0.002	RPS27	6232	Hs.504517	1q21	ribosomal protein S27 (metallopanstimulin 1)
616	202265_at	-2	0.05	-2	0.009	BMI1	648	Hs.380403	10p11.23	B lymphoma Mo-MLV insertion region (mouse)
617	207641_at	-2	0.05	-2	0.02	TNFRSF13B	23495	Hs.158341	17p11.2	tumor necrosis factor receptor superfamily, member 13B
618	209075_s_at	-2	0.05	-3	0.01	ISCU	23479	Hs.350702	12q24.1	iron-sulfur cluster assembly enzyme
619	213991_s_at	-2	0.05	-4	0.01	HS3ST1	9957	Hs.507348	4p16	heparan sulfate (glucosamine) 3-O-sulfotransferase 1
