# Supplementary material for: Genetic Analysis of the Early Natural History of Epithelial Ovarian Carcinoma
Source: PLoS One. 2010 Apr 26;5(4):e10358. doi: 10.1371/journal.pone.0010358 (PMC2859950; doi:10.1371/journal.pone.0010358)
Supplement: Table S6 — Genes differentially expressed in ovarian surface epithelium and ovarian cancer compared to ovarian cystic epithleium. “FC(S)” refers to the fold-change in ovarian surface epithelium compared to ovarian cystic epithelium, followed by the corresponding P-value. “FC(T)” refers to the fold-change in ovarian cancer compared to ovarian cystic epithelium, (0.08 MB XLS) [file pone.0010358.s006.xls]

## Sheet: Imported up-st-c.txt
Supplemental Table S6. Genes differentially expressed in ovarian surface epithelium and ovarian cancer compared to ovarian cystic epithleium. "FC(S)" refers to the fold-change in ovarian surface
epithelium compared to ovarian cystic epithelium, followed by the corresponding P-value. "FC(T)" refers to the fold-change in ovarian cancer compared to ovarian cystic epithelium,
followed by the corresponding P-value.
________________________________________________________________________________________________________________________										_______________________________________________________
List No.	Probe Set	FC(S)	P(S)	FC(T)	P(T)	Gene	Gene ID	Unigene	Chromosome	Description
1	204729_s_at	5	3e-05	4	0.0006	STX1A	6804	Hs.488683	7q11.23	syntaxin 1A (brain)
2	209819_at	8	7e-05	4	0.02	HABP4	22927	Hs.494567	9q22.3-q31	hyaluronan binding protein 4
3	214022_s_at	3	0.0005	4	0.0003	IFITM1	8519	Hs.458414	11p15.5	interferon induced transmembrane protein 1 (9-27)
4	212707_s_at	6	0.0007	4	0.0007	RASA4	10156	Hs.520599	7q22-q31.1	RAS p21 protein activator 4
5	210904_s_at	13	0.002	6	0.005	IL13RA1	3597	Hs.496646	Xq24	interleukin 13 receptor, alpha 1
6	210224_at	12	0.002	9	0.001	MR1	3140	Hs.101840	1q25.3	major histocompatibility complex, class I-related
7	222269_at	4	0.002	7	0.002	CXorf33	139322	Hs.512181	Xq21.1	AAIR8193
8	212203_x_at	3	0.002	2	0.002	IFITM3	10410	Hs.374650	11p15.5	interferon induced transmembrane protein 3 (1-8U)
9	215259_s_at	2	0.002	5	0.009	IGSF4C	199731	Hs.370984	19q13.32	immunoglobulin superfamily, member 4C
10	213933_at	28	0.003	11	0.007	PTGER3	5733	Hs.445000	1p31.2	prostaglandin E receptor 3 (subtype EP3)
11	209596_at	8	0.003	10	0.008	DKFZp564I1922	25878	Hs.369422	Xp22.33	adlican
12	208548_at	6	0.003	5	0.006	IFNA6	3443	Hs.533470	9p22	interferon, alpha 2
13	221690_s_at	6	0.003	27	0.0002	NALP2	55655	Hs.369279	19q13.42	NACHT, leucine rich repeat and PYD containing 2
14	221266_s_at	5	0.003	3	0.02	TM7SF4	81501	Hs.208036	8q23	DC-specific transmembrane protein
15	205505_at	20	0.004	7	0.05	GCNT1	2650	Hs.521568	9q13	glucosaminyl (N-acetyl) transferase 1, core 2
16	222168_at	17	0.004	5	0.008	ALDH1A3	220	Hs.459538	15q26.3	aldehyde dehydrogenase 1 family, member A3
17	221124_s_at	7	0.004	3	0.04	VSX1	30813	Hs.274264	20p11.23-p11.22	visual system homeobox 1 homolog, CHX10-like
18	205081_at	16	0.005	42	0.0003	CRIP1	1396	Hs.70327	7q11.23	cysteine-rich protein 1 (intestinal)
19	208925_at	6	0.005	5	0.04	C3orf4	56650	Hs.107393	3p11-q11	chromosome 3 open reading frame 4
20	217088_s_at	6	0.005	3	0.04	NCR1	9437	Hs.97084	19q13.42	natural cytotoxicity triggering receptor 1
21	214297_at	5	0.005	8	0.05	CSPG4	1464	Hs.513044	15q23	chondroitin sulfate proteoglycan 4
22	221836_s_at	4	0.005	3	0.02	T1	83696	Hs.26814	8q24.3	Tularik gene 1
23	201678_s_at	2	0.005	2	0.003	DC12	56941	Hs.458320	3q21.3	DC12 protein
24	209912_s_at	7	0.006	6	0.04	KIAA0415	9907	Hs.487393	7p22.2	KIAA0415 gene product
25	209699_x_at	5	0.006	2	0.04	AKR1C2	1646	Hs.460260	10p15-p14	aldo-keto reductase family 1, member C1
26	209289_at	4	0.006	3	0.01	NFIB	4781	Hs.370359	9p24.1	nuclear factor I/B
27	210690_at	15	0.007	4	0.04	KLRC4	8302	Hs.268510	12p13.2-p12.3	killer cell lectin-like receptor subfamily C, member 4
28	214714_at	5	0.007	6	0.008	ZNF394	84124	Hs.386324	7q22.1	zinc finger protein 394
29	200633_at	3	0.007	3	0.007	UBB	7314	Hs.356190	2p16	ribosomal protein S27a
30	201618_x_at	2	0.007	3	0.003	GPAA1	8733	Hs.4742	8q24.3	GPAA1P anchor attachment protein 1 homolog (yeast)
31	202145_at	3	0.008	3	0.02	LY6E	4061	Hs.521903	8q24.3	lymphocyte antigen 6 complex, locus E
32	213689_x_at	29	0.009	8	0.0005	RPL5	6125	Hs.180946	1p22.1	ribosomal protein L5
33	203661_s_at	11	0.01	4	0.03	TMOD1	7111	Hs.404289	9q22.3	tropomodulin 1
34	204355_at	10	0.01	7	0.03	DHX30	22907	Hs.517948	3p21.31	DEAH (Asp-Glu-Ala-His) box polypeptide 30
35	201650_at	7	0.01	8	0.01	KRT19	3880	Hs.514167	17q21.2	keratin 19
36	203071_at	6	0.01	8	0.003	SEMA3B	7869	Hs.82222	3p21.3	sema domain, Ig domain, short basic domain, secreted, 3B
37	208727_s_at	4	0.01	3	0.04	CDC42	998	Hs.467637	1p36.1	cell division cycle 42 (GTP binding protein, 25kDa)
38	214070_s_at	4	0.01	5	0.007	ATP10B	23120	Hs.109358	5q34	ATPase, Class V, type 10B
39	217434_at	3	0.01	3	0.009	MC2R	4158	Hs.248144	18p11.2	melanocortin 2 receptor (adrenocorticotropic hormone)
40	203502_at	2	0.01	2	0.01	BPGM	669	Hs.198365	7q31-q34	2,3-bisphosphoglycerate mutase
41	218429_s_at	2	0.01	2	0.002	FLJ11286	55337	Hs.175120	19p13.2	hypothetical protein FLJ11286
42	210427_x_at	1	0.01	2	0.003	ANXA2	302	Hs.511605	15q21-q22	annexin A2
43	201155_s_at	13	0.02	9	0.008	MFN2	9927	Hs.376681	1p36.21	mitofusin 2
44	203595_s_at	10	0.02	7	0.01	IFIT5	24138	Hs.252839	10q23.32	interferon-induced protein with tetratricopeptide repeats 5
45	200075_s_at	4	0.02	4	0.001	GUK1	2987	Hs.376933	1q32-q41	guanylate kinase 1
46	209840_s_at	4	0.02	3	0.01	LRRN3	54674	Hs.3781	7q31.1	leucine rich repeat neuronal 3
47	210493_s_at	4	0.02	4	0.003	MFAP3L	9848	Hs.178121	4q32.3	KIAA0626 gene product
48	208949_s_at	3	0.02	2	0.02	LGALS3	3958	Hs.531081	14q21-q22	lectin, galactoside-binding, soluble, 3 (galectin 3)
49	215001_s_at	3	0.02	2	0.02	GLUL	2752	Hs.518525	1q31	glutamate-ammonia ligase (glutamine synthase)
50	217213_at	3	0.02	2	0.005	SLC6A2	6530	Hs.78036	16q12.2	solute carrier family 6, member 2
51	218120_s_at	3	0.02	2	0.01	HMOX2	3163	Hs.284279	16p13.3	heme oxygenase (decycling) 2
52	219369_s_at	3	0.02	5	0.002	OTUB2	78990	Hs.278815	14q32.13	OTU domain, ubiquitin aldehyde binding 2
53	207059_at	2	0.02	1	0.02	PAX9	5083	Hs.132576	14q12-q13	paired box gene 9
54	213851_at	2	0.02	2	0.03	MGC52022	375346	Hs.528411	3p21.31	Similar to RIKEN cDNA 1810038N08 gene
55	215186_at	2	0.02	2	0.03	KIAA0984	23329	Hs.192492	12q14.1	KIAA0984 protein
56	210335_at	13	0.03	54	0.001	PAMCI	9182	Hs.527881	12q21.32	peptidylglycine alpha-amidating monooxygenase COOH-terminal interactor
57	217995_at	12	0.03	10	0.03	SQRDL	58472	Hs.511251	15q15	sulfide quinone reductase-like (yeast)
58	200646_s_at	5	0.03	7	0.001	NUCB1	4924	Hs.515524	19q13.2-q13.4	nucleobindin 1
59	222098_s_at	5	0.03	4	0.01	ZNF42	7593	Hs.399810	19q13.2-q13.4	zinc finger protein 42
60	216359_at	4	0.03	2	0.02	MUC7	4589	Hs.103944	4q13-q21	mucin 7, salivary
61	201820_at	3	0.03	4	0.04	KRT5	3852	Hs.433845	12q12-q13	keratin 4
62	202385_s_at	3	0.03	3	0.05	TCOF1	6949	Hs.519672	5q32-q33.1	Treacher Collins-Franceschetti syndrome 1
63	201861_s_at	2	0.03	3	0.004	LRRFIP1	9208	Hs.471779	2q37.3	leucine rich repeat (in FLII) interacting protein 1
64	204942_s_at	2	0.03	4	0.01	ALDH3B2	222	Hs.87539	11q13	aldehyde dehydrogenase 3 family, member B2
65	209008_x_at	2	0.03	3	0.005	KRT8	3856	Hs.533782	12q13	keratin 8
66	214213_x_at	2	0.03	2	0.03	LMNA	4000	Hs.491359	1q21.2-q21.3	lamin A/C
67	219084_at	2	0.03	3	0.006	NSD1	64324	Hs.208961	5q35.3	nuclear receptor binding SET domain protein 1
68	209929_s_at	4	0.04	5	0.03	IKBKG	8517	Hs.43505	Xq28	inhibitor of kappa light polypeptide gene enhancer in B-cells, kinase gamma
69	210953_at	4	0.04	5	0.03	KIAA0669	9819	Hs.52526	3q25.1	KIAA0669 gene product
70	214853_s_at	4	0.04	3	0.005	SHC1	6464	Hs.433795	1q21	SHC transforming protein 1
71	220160_s_at	4	0.04	4	0.004	KPTN	11133	Hs.25441	19q13.33	kaptin (actin binding protein)
72	201786_s_at	3	0.04	3	0.02	ADAR	103	Hs.12341	1q21.1-q21.2	adenosine deaminase, RNA-specific
73	201849_at	3	0.04	3	0.02	BNIP3	664	Hs.144873	10q26.3	BCL2/adenovirus E1B 19kDa interacting protein 3
74	205931_s_at	3	0.04	4	0.03	CREB5	9586	Hs.437075	7p15	cAMP responsive element binding protein 5
75	211129_x_at	3	0.04	3	0.03	EDA	1896	Hs.105407	Xq12-q13.1	ectodermal dysplasia 1, anhidrotic
76	214603_at	3	0.04	2	0.03	MAGEA2	4101	Hs.36980	Xq28	melanoma antigen, family A, 3
77	203365_s_at	2	0.04	4	0.01	MMP15	4324	Hs.80343	16q13-q21	matrix metalloproteinase 15 (membrane-inserted)
78	206288_at	2	0.04	5	0.02	PGGT1B	5229	Hs.254006	5q23.1	protein geranylgeranyltransferase type I, beta subunit
79	211729_x_at	2	0.04	3	0.007	BLVRA	644	Hs.488143	7p14-CEN	biliverdin reductase A
80	206876_at	6	0.05	5	0.008	SIM1	6492	Hs.534129	6q16.3-q21	single-minded homolog 1 (Drosophila)
81	208942_s_at	3	0.05	3	0.01	TLOC1	7095	Hs.529591	3q26.2-q27	translocation protein 1
82	210253_at	3	0.05	13	0.02	HTATIP2	10553	Hs.90753	11p15.1	HIV-1 Tat interactive protein 2, 30kDa
83	200666_s_at	2	0.05	2	0.006	DNAJB1	3337	Hs.515210	19p13.2	DnaJ (Hsp40) homolog, subfamily B, member 1
84	200923_at	2	0.05	3	0.01	LGALS3BP	3959	Hs.514535	17q25	lectin, galactoside-binding, soluble, 3 binding protein
85	211139_s_at	2	0.05	2	0.04	NAB1	4664	Hs.107474	2q32.3-q33	NGFI-A binding protein 1 (EGR1 binding protein 1)
86	215994_x_at	2	0.05	2	0.02	KIAA0676	23061	Hs.155829	5q35.3	KIAA0676 protein
87	202712_s_at	1	0.05	4	0.008	CKMT1	1159	Hs.425633	15q15	creatine kinase, mitochondrial 1 (ubiquitous)
List No.	Probe Set	FC(S)	P(S)	FC(T)	P(T)	Gene	Gene ID	Unigene	Chromosome	Description
88	202890_at	-223	9e-05	-2	0.02	MAP7	9053	Hs.486548	6q23.2	microtubule-associated protein 7
89	201563_at	-4	9e-05	-2	0.02	SORD	6652	Hs.878	15q15.3	sorbitol dehydrogenase
90	209739_s_at	-15	0.0002	-6	0.003	PNPLA4	8228	Hs.264	Xp22.3	GS2 gene
91	209705_at	-13	0.0002	-3	0.004	M96	22823	Hs.31016	1p22.1	likely ortholog of mouse metal response element binding transcription factor 2
92	204798_at	-22	0.0003	-3	0.004	MYB	4602	Hs.531941	6q22-q23	v-myb myeloblastosis viral oncogene homolog (avian)
93	202043_s_at	-4	0.0003	-2	0.004	SMS	6611	Hs.529887	Xp22.1	spermine synthase
94	205642_at	-10	0.0004	-3	0.02	CEP1	11064	Hs.246344	9q33-q34	centrosomal protein 1
95	37512_at	-90	0.0005	-80	0.003	RODH	8630	Hs.524513	12q13	3-hydroxysteroid epimerase
96	218645_at	-20	0.0005	-5	0.02	ZNF277	11179	Hs.489722	7q31.1	zinc finger protein (C2H2 type) 277
97	222102_at	-26	0.0007	-24	0.0003	GSTA3	2940	Hs.102484	6p12.1	glutathione S-transferase A3
98	210809_s_at	-17	0.0007	-17	0.02	POSTN	10631	Hs.136348	13q13.3	periostin, osteoblast specific factor
99	203374_s_at	-9	0.0008	-2	0.02	TPP2	7174	Hs.432424	13q32-q33	tripeptidyl peptidase II
100	205933_at	-8	0.0009	-7	0.03	SETBP1	26040	Hs.435458	18q21.1	SET binding protein 1
101	220269_at	-69	0.001	-30	0.001	FLJ23049	79740	Hs.478143	3q26.2	hypothetical protein FLJ23049
102	204720_s_at	-6	0.001	-2	0.01	DNAJC6	9829	Hs.536063	1pTER-q31.3	DnaJ (Hsp40) homolog, subfamily C, member 6
103	218769_s_at	-3	0.001	-2	0.002	ANKRA2	57763	Hs.239154	5q12-q13	ankyrin repeat, family A (RFXANK-like), 2
104	203690_at	-31	0.002	-11	0.02	TUBGCP3	10426	Hs.224152	13q34	tubulin, gamma complex associated protein 3
105	203659_s_at	-14	0.002	-4	0.01	RFP2	10206	Hs.436922	13q14	ret finger protein 2
106	202922_at	-11	0.002	-7	0.02	GCLC	2729	Hs.271264	6p12	glutamate-cysteine ligase, catalytic subunit
107	201645_at	-7	0.002	-9	0.02	TNC	3371	Hs.143250	9q33	tenascin C (hexabrachion)
108	203187_at	-5	0.002	-6	0.0003	DOCK1	1793	Hs.159195	10q26.13-q26.3	dedicator of cytokinesis 1
109	217810_x_at	-2	0.002	-2	0.01	LARS	51520	Hs.432674	5q32	leucyl-tRNA synthetase
110	219667_s_at	-36	0.003	-6	0.004	BANK1	55024	Hs.480400	4q24	B-cell scaffold protein with ankyrin repeats 1
111	215665_at	-14	0.003	-8	0.009	HSD3B1	3283	Hs.364941	1p13.1	hydroxy-delta-5-steroid dehydrogenase, 3 beta- and steroid delta-isomerase 2
112	219767_s_at	-11	0.003	-2	0.01	CRYZL1	9946	Hs.352671	21q21.3	crystallin, zeta (quinone reductase)-like 1
113	209631_s_at	-10	0.003	-6	0.02	GPR37	2861	Hs.406094	7q31	G protein-coupled receptor 37
114	204487_s_at	-7	0.003	-8	0.0007	KCNQ1	3784	Hs.95162	11p15.5	potassium voltage-gated channel, KQT-like subfamily, member 1
115	212532_s_at	-5	0.003	-2	0.04	FLJ30656	124801	Hs.355570	17q21.31	hypothetical protein FLJ30656
116	212981_s_at	-4	0.003	-7	0.004	KIAA0738	9747	Hs.406492	7q35	KIAA0738 gene product
117	203575_at	-3	0.003	-2	0.001	CSNK2A2	1459	Hs.82201	16p13.3-p13.2	casein kinase 2, alpha prime polypeptide
118	212641_at	-3	0.003	-1	0.02	HIVEP2	3097	Hs.510172	6q23-q24	HIV type I enhancer binding protein 2
119	220302_at	-19	0.004	-5	0.02	MAK	4117	Hs.446125	6q22	male germ cell-associated kinase
120	212599_at	-7	0.004	-3	0.007	AUTS2	26053	Hs.21631	7q11.22-q11.23	autism susceptibility candidate 2
121	212902_at	-7	0.004	-3	0.05	SEC24A	10802	Hs.211612	5q31.2	SEC24 related gene family, member A (S. cerevisiae)
122	201798_s_at	-6	0.004	-4	0.0003	FER1L3	26509	Hs.500572	10q24	fer-1-like 3, myoferlin (C. elegans)
123	204057_at	-5	0.004	-9	0.002	IRF8	3394	Hs.137427	16q24.1	interferon consensus sequence binding protein 1
124	206891_at	-4	0.004	-6	0.001	ACTN3	89	Hs.445037	11q13-q14	actinin, alpha 3
125	209946_at	-18	0.005	-4	0.05	VEGFC	7424	Hs.435215	4q34.1-q34.3	vascular endothelial growth factor C
126	208107_s_at	-9	0.005	-4	0.009	LOC81691	81691	Hs.177926	16p13.11	exonuclease NEF-sp
127	201307_at	-6	0.005	-3	0.02	SEPT11	55752	Hs.128199	4q21.22	hypothetical protein FLJ10849
128	209737_at	-6	0.005	-4	0.03	AIP1	9863	Hs.488945	7q21	atrophin-1 interacting protein 1
129	203163_at	-5	0.005	-3	0.04	KATNB1	10300	Hs.275675	16q13	katanin p80 (WD repeat containing) subunit B 1
130	210161_at	-2	0.005	-2	0.04	NFATC1	4772	Hs.534074	18q23	nuclear factor of activated T-cells, cytoplasmic, calcineurin-dependent 1
131	203159_at	-11	0.006	-4	0.003	GLS	2744	Hs.116448	2q32-q34	glutaminase
132	206528_at	-11	0.006	-12	0.02	TRPC6	7225	Hs.159003	11q21-q22	transient receptor potential cation channel, subfamily C, member 6
133	214633_at	-11	0.006	-12	0.01	SOX3	6658	Hs.157429	Xq26-q27	SRY (sex determining region Y)-box 3
134	202742_s_at	-10	0.006	-7	0.0007	PRKACB	5567	Hs.487325	1p36.1	protein kinase, cAMP-dependent, catalytic, beta
135	209353_s_at	-9	0.006	-18	0.002	SIN3B	23309		19p13.12	SIN3 homolog B, transcriptional regulator (yeast)
136	204373_s_at	-8	0.006	-2	0.05	CAP350	9857	Hs.413045	1p36.13-q41	centrosome-associated protein 350
137	212172_at	-5	0.006	-3	0.03	AK2	204	Hs.470907	1p34	adenylate kinase 2
138	210146_x_at	-4	0.006	-10	0.01	LILRB2	10288	Hs.515601	19q13.4	leukocyte immunoglobulin-like receptor, subfamily B, member 2
139	49485_at	-2	0.006	-2	0.03	PRDM4	11108	Hs.506655	12q23-q24.1	PR domain containing 4
140	217256_x_at	-2	0.006	-3	0.004	RPL36AL	6166	Hs.444749	11p15.1	ribosomal protein L36a-like
141	211763_s_at	-8	0.007	-3	0.02	UBE2B	7320	Hs.385986	5q23-q31	ubiquitin-conjugating enzyme E2B (RAD6 homolog)
142	203376_at	-6	0.007	-5	0.002	CDC40	51362	Hs.428147	6q22.1	cell division cycle 40 homolog (yeast)
143	221097_s_at	-2	0.007	-3	0.004	KCNMB2	10242	Hs.478368	3q26.2-q27.1	potassium large conductance calcium-activated channel, subfamily M, beta member 2
144	207414_s_at	-50	0.008	-87	0.0007	PCSK6	5046	Hs.498494	15q26	paired basic amino acid cleaving system 4
145	205590_at	-16	0.008	-10	0.004	RASGRP1	10125	Hs.511010	15q15	RAS guanyl releasing protein 1
146	218899_s_at	-7	0.008	-10	0.04	BAALC	79870	Hs.533446	8q22.3	brain and acute leukemia, cytoplasmic
147	206669_at	-6	0.008	-8	0.009	GAD1	2571	Hs.420036	2q31	glutamate decarboxylase 1 (brain, 67kDa)
148	201832_s_at	-2	0.008	-5	5e-05	VDP	8615	Hs.292689	4q21.21	vesicle docking protein p115
149	219887_at	-6	0.009	-6	0.008	FLJ10786	55231	Hs.121072	11q13.1	hypothetical protein FLJ10786
150	213353_at	-3	0.009	-7	0.02	ABCA5	23461	Hs.421474	17q24.3	ATP-binding cassette, sub-family A (ABC1), member 5
151	212847_at	-2	0.009	-3	0.02	NEXN	91624	Hs.22370	1p31.1	nexilin (F actin binding protein)
152	204686_at	-19	0.01	-4	0.04	IRS1	3667	Hs.471508	2q36	insulin receptor substrate 1
153	220649_at	-8	0.01	-15	0.02	LOC340351	340351	Hs.546546	7q33	hypothetical protein LOC340351
154	201607_at	-5	0.01	-3	0.03	PWP1	11137	Hs.506652	12q24.11	nuclear phosphoprotein similar to S. cerevisiae PWP1
155	210230_at	-5	0.01	-6	0.04	RNU2	6066		17q12-q21	RNA, U2 small nuclear
156	209571_at	-4	0.01	-2	0.01	CIR	9541	Hs.470675	2q31.1	CBF1 interacting corepressor
157	209893_s_at	-4	0.01	-3	0.02	FUT4	2526	Hs.390420	11q21	fucosyltransferase 4
158	212753_at	-4	0.01	-3	0.03	RNF3	10336	Hs.144309	4p16.3	ring finger protein 3
159	221864_at	-4	0.01	-1	0.04	MGC13024	93129	Hs.460617	16p11.2	hypothetical protein MGC13024
160	206507_at	-3	0.01	-3	0.02	ZNF305	9753	Hs.134816	6p22.2-p21.3	zinc finger protein 305
161	212277_at	-3	0.01	-3	0.01	MTMR4	9110	Hs.514373	17q22-q23	myotubularin related protein 4
162	218422_s_at	-3	0.01	-4	0.005	C13orf10	64062	Hs.131715	13q22.2	chromosome 13 open reading frame 10
163	201071_x_at	-2	0.01	-2	0.04	SF3B1	23451	Hs.471011	2q33.1	splicing factor 3b, subunit 1, 155kDa
164	205934_at	-2	0.01	-4	0.008	PLCL1	5334	Hs.153322	2q33	phospholipase C-like 1
165	206185_at	-2	0.01	-2	0.0003	CRYBB1	1414	Hs.37135	22q12.1	crystallin, beta B1
166	214572_s_at	-10	0.02	-24	0.008	INSL3	3640	Hs.37062	19p13.2-p12	insulin-like 3 (Leydig cell)
167	213808_at	-9	0.02	-11	0.03	ADAM23	8745	Hs.370287	2q33	a disintegrin and metalloproteinase domain 23
168	214681_at	-9	0.02	-6	0.003	GK	2710	Hs.1466	4q32.1	glycerol kinase
169	206370_at	-8	0.02	-10	0.007	PIK3CG	5294	Hs.32942	7q22.3	phosphoinositide-3-kinase, catalytic, gamma polypeptide
170	209647_s_at	-8	0.02	-2	0.02	SOCS5	9655	Hs.468426	2p21	suppressor of cytokine signaling 5
171	214591_at	-8	0.02	-29	0.01	KLHL4	56062	Hs.49075	Xq21.3	kelch-like 4 (Drosophila)
172	61732_r_at	-7	0.02	-3	0.03	CCDC2	80173	Hs.145402	9p21.1	coiled-coil domain containing 2
173	209924_at	-7	0.02	-4	0.004	CCL18	6362	Hs.143961	17q11.2	chemokine (C-C motif) ligand 18
174	212366_at	-6	0.02	-4	0.004	ZNF292	23036	Hs.485892	6q15	zinc finger protein 292
175	44822_s_at	-5	0.02	-2	0.009	KIAA1193	54531	Hs.101891	19p13.3	KIAA1193
176	206119_at	-5	0.02	-11	0.002	BHMT	635	Hs.80756	5q13.1-q15	betaine-homocysteine methyltransferase
177	206964_at	-5	0.02	-6	0.03	CML2	51471	Hs.458287	2p13.1	N-acetyltransferase 8 (camello like)
178	208999_at	-5	0.02	-2	0.03	SEPT8	23176	Hs.533017	5q31	septin 8
179	209094_at	-5	0.02	-2	0.009	DDAH1	23576	Hs.379858	1p22	dimethylarginine dimethylaminohydrolase 1
180	209560_s_at	-5	0.02	-32	0.0004	DLK1	8788	Hs.533717	14q32	delta-like 1 homolog (Drosophila)
181	209654_at	-5	0.02	-3	0.04	KIAA0947	23379	Hs.449296	5p15.32	KIAA0947 protein
182	218263_s_at	-5	0.02	-2	0.02	LOC58486	58486	Hs.25726	11p15.3	transposon-derived Buster1 transposase-like protein
183	207405_s_at	-4	0.02	-3	0.007	RAD17	5884	Hs.16184	5q13	RAD17 homolog (S. pombe)
184	212307_s_at	-4	0.02	-2	0.01	OGT	8473	Hs.405410	Xq13	O-linked N-acetylglucosamine (GlcNAc) transferase
185	213288_at	-4	0.02	-3	0.03	OACT2	129642	Hs.467634	2p25.2	hypothetical protein BC016005
186	214222_at	-4	0.02	-4	0.02	DNAH7	56171		2q33.1	dynein, axonemal, heavy polypeptide 7
187	200731_s_at	-3	0.02	-4	0.02	PTP4A1	7803	Hs.227777	6q12	protein tyrosine phosphatase type IVA, member 1
188	207555_s_at	-3	0.02	-3	0.008	TBXA2R	6915	Hs.442530	19p13.3	thromboxane A2 receptor
189	203034_s_at	-2	0.02	-4	0.0008	RPL27A	6157	Hs.523463	11p15	ribosomal protein L27a
190	212454_x_at	-2	0.02	-3	0.002	HNRPDL	9987	Hs.527105	4q13-q21	heterogeneous nuclear ribonucleoprotein D-like
191	212633_at	-2	0.02	-3	0.01	KIAA0776	23376	Hs.149367	6q16.3	KIAA0776
192	208645_s_at	-1	0.02	-2	0.003	RPS14	6208	Hs.381126	5q31-q33	ribosomal protein S14
193	218096_at	-12	0.03	-2	0.03	AGPAT5	55326	Hs.490899	8p23.1	acid acyltransferase-epsilon
194	222307_at	-11	0.03	-14	0.001	LOC282997	282997	Hs.192249	10q25.3	hypothetical protein LOC282997
195	214930_at	-10	0.03	-48	0.0008	SLITRK5	26050		13q31.1	SLIT and NTRK-like family, member 5
196	207696_at	-8	0.03	-9	0.03	FUT9	10690	Hs.200282	6q16	fucosyltransferase 9 (alpha (1,3) fucosyltransferase)
197	217790_s_at	-8	0.03	-2	0.03	SSR3	6747	Hs.518346	3q25.31	signal sequence receptor, gamma
198	203177_x_at	-6	0.03	-3	0.04	TFAM	7019	Hs.75133	10q21	transcription factor A, mitochondrial
199	205181_at	-6	0.03	-2	0.04	ZNF193	7746	Hs.100921	6p21.3	zinc finger protein 193
200	214319_at	-6	0.03	-3	0.02	13CDNA73	10129	Hs.507669	13q12.3	hypothetical protein CG003
201	221243_s_at	-6	0.03	-6	0.03	PRO1596	29013	Hs.269211	1p34.3	PRO1596 protein
202	203058_s_at	-4	0.03	-8	0.0003	PAPSS2	9060	Hs.524491	10q23-q24	3'-phosphoadenosine 5'-phosphosulfate synthase 2
203	214789_x_at	-4	0.03	-3	0.003	SRP46	10929	Hs.476680	11q22	Splicing factor, arginine/serine-rich, 46kD
204	215554_at	-4	0.03	-3	0.01	GPLD1	2822	Hs.512001	6p22.3-p22.2	glycosylphosphatidylinositol specific phospholipase D1
205	220400_at	-4	0.03	-4	0.02	COH1	157680	Hs.191540	8q22.2	Cohen syndrome 1
206	201873_s_at	-3	0.03	-2	0.04	ABCE1	6059	Hs.12013	4q31	ATP-binding cassette, sub-family E (OABP), member 1
207	201964_at	-3	0.03	-2	0.01	ALS4	23064	Hs.460317	9q34.3	senataxin
208	202304_at	-3	0.03	-3	0.008	FNDC3	22862	Hs.508010	13q14.12	fibronectin type III domain containing 3
209	204299_at	-3	0.03	-3	0.004	FUSIP1	10772	Hs.3530	1p36.11	FUS interacting protein (serine-arginine rich) 1
210	205947_s_at	-3	0.03	-4	0.02	VIPR2	7434	Hs.490817	7q36.3	vasoactive intestinal peptide receptor 2
211	207842_s_at	-3	0.03	-3	0.02	CASC3	22794	Hs.350229	17q11-q21.3	cancer susceptibility candidate 3
212	208863_s_at	-3	0.03	-9	0.02	SFRS1	6426	Hs.68714	17q21.3-q22	splicing factor, arginine/serine-rich 1
213	210281_s_at	-3	0.03	-3	0.03	ZNF198	7750	Hs.507433	13q11-q12	zinc finger protein 198
214	212653_s_at	-3	0.03	-4	0.006	EHBP1	23301	Hs.271667	2p15	NPF/calponin-like protein
215	213405_at	-3	0.03	-2	0.03	RAB22A	57403	Hs.529044	20q13.32	RAB22A, member RAS oncogene family
216	215434_x_at	-3	0.03	-3	0.005	FLJ20719	55672	Hs.445080	1p36.13	AG1
217	220257_x_at	-3	0.03	-3	0.01	NXF2	56001	Hs.530358	Xq22.1	nuclear RNA export factor 2
218	203804_s_at	-2	0.03	-3	0.005	CROP	51747	Hs.130293	17q21	acid-inducible phosphoprotein
219	204536_s_at	-2	0.03	-2	0.02	REST	5978	Hs.401145	4q12	RE1-silencing transcription factor
220	205042_at	-2	0.03	-2	0.05	GNE	10020	Hs.5920	9p13.1	glucosamine (UDP-N-acetyl)-2-epimerase/N-acetylmannosamine kinase
221	205139_s_at	-2	0.03	-3	0.002	UST	10090	Hs.131514	6q24.3	uronyl-2-sulfotransferase
222	207217_s_at	-2	0.03	-2	0.02	NOX1	27035	Hs.546362	Xq22	NADPH oxidase 1
223	209087_x_at	-2	0.03	-2	0.009	MCAM	4162	Hs.511397	11q23.3	melanoma cell adhesion molecule
224	213245_at	-2	0.03	-6	0.006	ADCY1	107	Hs.192215	7p13-p12	adenylate cyclase 1 (brain)
225	216354_at	-2	0.03	-2	0.02	RPL12	6136	Hs.408054	9q34	ribosomal protein L12
226	200705_s_at	-1	0.03	-5	0.001	EEF1B2	1933	Hs.421608	2q33-q34	eukaryotic translation elongation factor 1 beta 2
227	211720_x_at	-1	0.03	-2	0.03	RPLP0	6175	Hs.448226	12q24.2	ribosomal protein, large, P0
228	218067_s_at	-1	0.03	-4	0.0003	FLJ10154	55082	Hs.508644	13q33.2	hypothetical protein FLJ10154
229	203924_at	-34	0.04	-16	0.01	GSTA1	2938	Hs.446309	6p12.1	glutathione S-transferase A1
230	201769_at	-15	0.04	-4	0.01	ENTH	9685	Hs.132853	5q23.1-q33.3	enthoprotin
231	201017_at	-10	0.04	-4	0.003	EIF1AX	1964	Hs.522590	Xp22.13	eukaryotic translation initiation factor 1A, X-linked
232	206005_s_at	-10	0.04	-4	0.03	C6orf84	22832	Hs.485865	6q15	chromosome 6 open reading frame 84
233	206498_at	-9	0.04	-9	0.003	OCA2	4948	Hs.130937	15q11.2-q12	oculocutaneous albinism II
234	219335_at	-9	0.04	-3	0.04	ARMCX5	64860	Hs.522729	Xq22.1-q22.3	hypothetical protein FLJ12969
235	221047_s_at	-9	0.04	-3	0.02	MARK1	4139	Hs.497806	1q42.11	MAP/microtubule affinity-regulating kinase 1
236	204084_s_at	-6	0.04	-2	0.01	CLN5	1203	Hs.30213	13q21.1-q32	ceroid-lipofuscinosis, neuronal 5
237	206721_at	-5	0.04	-6	0.02	LOC57821	57821	Hs.130746	1q24	hypothetical protein LOC57821
238	219252_s_at	-5	0.04	-4	0.05	FAM51A1	54960	Hs.528647	Xp22.31	hypothetical protein FLJ20514
239	221238_at	-5	0.04	-2	0.04	NSBP1	79366	Hs.282204	Xq13.3	nucleosomal binding protein 1
240	209076_s_at	-4	0.04	-2	0.03	WDR45L	56270	Hs.201390	17q25.3	hypothetical protein 628
241	210073_at	-4	0.04	-10	0.02	SIAT8A	6489	Hs.408614	12p12.1-p11.2	sialyltransferase 8A
242	206664_at	-3	0.04	-5	0.04	SI	6476	Hs.429596	3q25.2-q26.2	sucrase-isomaltase (alpha-glucosidase)
243	208346_at	-3	0.04	-4	0.008	PPBPL2	10895	Hs.3134	4q21.21	DNA-binding protein amplifying expression of surfactant protein B
244	200063_s_at	-2	0.04	-2	0.02	NPM1	4869	Hs.519452	17q21	anaplastic lymphoma kinase (Ki-1)
245	204398_s_at	-2	0.04	-2	0.008	EML2	24139	Hs.24178	19q13.32	echinoderm microtubule associated protein like 2
246	204661_at	-2	0.04	-2	0.007	CDW52	1043	Hs.276770	1p36	CDW52 antigen (CAMPATH-1 antigen)
247	211668_s_at	-2	0.04	-2	0.003	PLAU	5328	Hs.77274	10q24	plasminogen activator, urokinase
248	211685_s_at	-2	0.04	-2	0.02	NCALD	83988	Hs.492427	8q22-q23	neurocalcin delta
249	213612_x_at	-2	0.04	-2	0.02	DJ328E19.C1.1	25832	Hs.515947	1q12-1q21.2	hypothetical protein FLJ20719
250	213722_at	-2	0.04	-3	0.04	SOX2	6657	Hs.518438	3q26.3-q27	SRY (sex determining region Y)-box 2
251	214694_at	-2	0.04	-3	0.05	M-RIP	23164	Hs.462341	17p11.2	myosin phosphatase-Rho interacting protein
252	206685_at	-14	0.05	-19	0.04	HCG4	54435	Hs.60856	6p21.3	HLA complex group 4
253	213256_at	-11	0.05	-3	0.03	MARCH-III	115123	Hs.132441	5q23.3	hypothetical protein MGC48332
254	213359_at	-7	0.05	-4	0.02	HNRPD	3184	Hs.480073	4q21.1-q21.2	heterogeneous nuclear ribonucleoprotein D
255	213725_x_at	-7	0.05	-6	0.03	LOC283824	283824	Hs.22907	16p13.12	hypothetical protein LOC283824
256	214823_at	-6	0.05	-3	0.01	ZNF204	7754	Hs.8198	6p21.3	zinc finger protein 204
257	201918_at	-4	0.05	-5	0.03	FLJ10618	55186	Hs.144130	3q23	hypothetical protein FLJ10618
258	207968_s_at	-4	0.05	-7	0.0007	MEF2C	4208	Hs.444409	5q14	MADS box transcription enhancer factor 2, polypeptide C
259	217056_at	-4	0.05	-8	0.009	TRA@	6955	Hs.508880	14q11.2	T cell receptor alpha locus
260	219030_at	-4	0.05	-2	0.009	CGI-121	51002	Hs.157401	2p24.3-p24.1	CGI-121 protein
261	205594_at	-3	0.05	-2	0.04	KIAA0924	22834	Hs.463375	17q21.33	KIAA0924 protein
262	213120_at	-3	0.05	-6	0.01	KIAA0701	23074	Hs.387336	12q23.2-q23.3	KIAA0701 protein
263	221399_at	-3	0.05	-6	0.02	EDA2R	60401	Hs.302017	Xq12	ectodysplasin A2 isoform receptor
264	201406_at	-2	0.05	-3	0.004	RPL36A	6173	Hs.432485	11p15.1	ribosomal protein L36a-like
265	202972_s_at	-2	0.05	-2	0.02	FAM13A1	10144	Hs.97270	4q22.1	family with sequence similarity 13, member A1
266	210763_x_at	-2	0.05	-2	0.02	NCR3	259197	Hs.509513	6p21.3	natural cytotoxicity triggering receptor 3
267	212270_x_at	-1	0.05	-5	0.003	RPL17	6139	Hs.293653	18q21	ribosomal protein L17
